1 Machine learning identifies signatures of host adaptation  
2 in the bacterial pathogen *Salmonella enterica*

3

4 Short title: Machine learning identifies signatures of bacterial host adaptation

5

6 Nicole E. Wheeler<sup>1,2,\*</sup>, Paul P. Gardner<sup>2,3</sup>, Lars Barquist<sup>4,5,\*</sup>

7

8 1. Wellcome Sanger Institute, Hinxton, United Kingdom.

9 2. Biomolecular Interaction Centre, School of Biological Sciences, University of Canterbury, Christchurch, New  
10 Zealand.

11 3. Department of Biochemistry, University of Otago, Dunedin, New Zealand.

12 4. Institute for Molecular Infection Biology, University of Wuerzburg, Wuerzburg, Germany.

13 5. Helmholtz Institute for RNA-based Infection Research, Wuerzburg, Germany

14 \* Correspondence to: [nw17@sanger.ac.uk](mailto:nw17@sanger.ac.uk); [lars.barquist@helmholtz-hiri.de](mailto:lars.barquist@helmholtz-hiri.de)

15

16 Keywords: hidden Markov model, random forest, loss-of-function, niche adaptation.

17

## 18 **Abstract**

19 Emerging pathogens are a major threat to public health, however understanding how  
20 pathogens adapt to new niches remains a challenge. New methods are urgently required to  
21 provide functional insights into pathogens from the massive genomic data sets now being  
22 generated from routine pathogen surveillance for epidemiological purposes. Here, we  
23 measure the burden of atypical mutations in protein coding genes across independently  
24 evolved *Salmonella enterica* lineages, and use these as input to train a random forest  
25 classifier to identify strains associated with extraintestinal disease. Members of the species  
26 fall along a continuum, from pathovars which cause gastrointestinal infection and low  
27 mortality, associated with a broad host-range, to those that cause invasive infection and high  
28 mortality, associated with a narrowed host range. Our random forest classifier learned to  
29 perfectly discriminate long-established gastrointestinal and invasive serovars of *Salmonella*.  
30 Additionally, it was able to discriminate recently emerged *Salmonella* Enteritidis and  
31 Typhimurium lineages associated with invasive disease in immunocompromised populations  
32 in sub-Saharan Africa, and within-host adaptation to invasive infection. We dissect the  
33 architecture of the model to identify the genes that were most informative of phenotype,  
34 revealing a common theme of degradation of metabolic pathways in extraintestinal lineages.  
35 This approach accurately identifies patterns of gene degradation and diversifying selection  
36 specific to invasive serovars that have been captured by more labour-intensive  
37 investigations, but can be readily scaled to larger analyses.

## 38 **Introduction**

39 Understanding how bacteria adapt to new niches and hosts and thus emerge or re-emerge  
40 as a cause of infectious disease in human and animals is of critical importance to  
41 anticipating and preventing epidemic disease [1,2]. With the decreasing cost of genome  
42 sequencing, comparative genomics has become a rich source of insight into the origins and

43 movement of bacteria in new pathogenic niches. However, translating whole genome  
44 sequence databases into mechanistic and functional insights remains a challenge.

45

46 Early expectations were that pathogen evolution would be driven primarily by the acquisition  
47 of virulence factors. However, as whole-genome sequencing has become increasingly  
48 routine, a decidedly more complex picture has emerged [3,4]. A pattern of bacterial entrance  
49 to a new niche followed by adaptation through the loss of antivirulence loci and reduced  
50 metabolic flexibility is now recognised as a paradigm of the emergence of important human  
51 pathogens from non-pathogenic bacterial species [5–8]. These new niches can be the result  
52 of virulence factor acquisition providing access to a previously inaccessible niche in a so-  
53 called foothold moment [8], or the emergence of new host niches driven by chronic disease  
54 [9–11]. While pathogen and host requirements for infection vary, there is increasing  
55 evidence of parallel evolution in bacteria adapting to the same or similar host niche. This is  
56 perhaps nowhere more evident than in the species *Salmonella enterica*.

57

58 *Salmonella enterica* strains that cause disease in warm-blooded mammals lie on a spectrum  
59 from those that have a broad host range and cause self-limiting gastrointestinal infection, to  
60 those that are more restricted in host range, but cause systemic disease and are typically  
61 associated with higher mortality [11,12]. Host-restricted, extraintestinal variants of  
62 *Salmonella enterica* have evolved independently multiple times from gastrointestinal  
63 ancestors [13], and show a greater degree of gene degradation compared to their generalist  
64 relatives [14–16]. There are common patterns in the genes that undergo pseudogenization in  
65 invasive *Salmonella*, most obviously an extensive network of genes required for anaerobic  
66 metabolism in the inflamed host [17,18], a pattern with parallels in other host-adapting  
67 enteropathogens [5].

68

69 Identifying these signals of parallel evolution has been challenging, relying mainly on manual  
70 annotation and comparison of pseudogenes [17,18]. Detection of pseudogenes in particular

71 relies on ad-hoc criteria to identify large truncations, deletions, or frameshifts [19,20]. It is  
72 rare that the same genes or complete pathways are pseudogenized in host-adapted species;  
73 rather interpretation has relied on identifying overrepresentation of independent  
74 pseudogenization events clustered in certain pathways [17]. If pseudogenization leads to  
75 pathway attenuation or inactivation, it seems likely that reduced selective pressure will lead  
76 to a higher incidence of detrimental mutation fixation in other genes in these pathways.  
77 Indeed, we have previously shown that functional variant calling, based on sequence  
78 deviation from patterns of conservation observed in deep sequence alignments, shows a  
79 similar functional signal in host-restricted *Salmonella enterica* serovar Gallinarum to  
80 pseudogene analysis [21], identifying a larger cohort of genes where constraints on drift  
81 appear to have been lifted during host-adaptation.

82

83 In previous work we developed DeltaBS, a profile hidden Markov model (HMM) based  
84 approach to functional variant calling [21]. The basic assumption of this approach is that  
85 variation in conserved positions of a protein sequence is more likely to affect protein function  
86 than variation in less conserved regions. This approach can integrate information about  
87 nonsynonymous mutations, indels, and truncations. We have previously shown that DeltaBS  
88 can successfully identify functional changes in genes that would be missed by standard  
89 pseudogene analysis [22], and that a subset of genes in host-adapted strains appear to  
90 accumulate large DeltaBS values [21]. Additionally, others have observed similar changes in  
91 DeltaBS distributions during adaptation of *Salmonella* to a single immunocompromised host  
92 [10]. We generally assume that a large DeltaBS value is indicative of a decay in protein  
93 function, however a modest increase in DeltaBS associated with a phenotype may instead  
94 be indicative of diversifying selection.

95

96 Here, we have leveraged these previous observations to identify signatures of mutational  
97 burden consistent with adaptation to an invasive lifestyle. We have developed a random  
98 forest classifier using delta bitscore (DeltaBS) functional variant calling [21] that can perfectly

99 separate intestinal *Salmonella* serovars from host-adapted, extraintestinal serovars. We use  
100 random forest models because they perform well on datasets with few informative variables  
101 [23,24], and the decision tree structure they employ has the potential to detect functional  
102 relationships (i.e. epistasis) between genes [25,26]. They have been applied successfully in  
103 the past to predict microbial phenotype using gene presence/absence data [27], and SNPs  
104 already known to be associated with phenotype [28,29]. We show that these models  
105 produce interpretable signatures of host-adaptation, and furthermore that these signatures  
106 can be detected in strains of *Salmonella* associated with invasive disease in  
107 immunocompromised populations in sub-Saharan Africa.

## 108 **Results**

### 109 ***Constructing a random forest classifier for extraintestinal Salmonellae***

110 The approach taken in this investigation is summarised in Fig 1, and described below. We  
111 built our model using a collection of genomes from well-characterised reference strains of  
112 gastrointestinal and extraintestinal *Salmonella* serovars (S1 Table), drawing on the extensive  
113 curation of orthology relationships performed by Nuccio and Bäumlner [17]. These strains  
114 were originally characterised as “gastrointestinal” or “extraintestinal” based on common  
115 patterns of gene degradation, host restriction and clinical characteristics observed among  
116 the extraintestinal strains [17], and we have employed this same categorisation our analysis.  
117 We scored the functional importance of sequence variation by comparing the protein coding  
118 genes of each serovar to profile HMMs from the eggNOG database [30], designed to capture  
119 patterns of sequence variation typically seen in the protein coding genes of  
120 Gammaproteobacteria (see Methods).

121

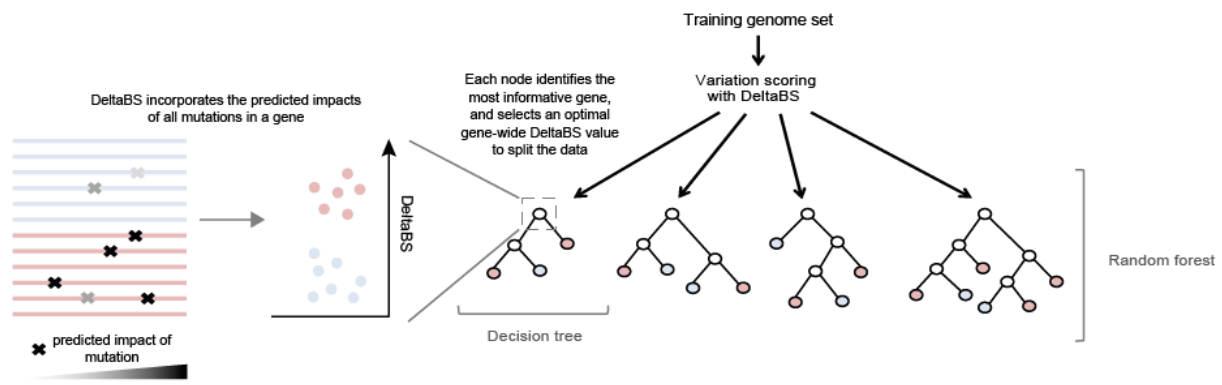

122

## 123 **Fig 1 | Overview of the approach employed in this study**

124 For each genome, the functional significance of sequence variation within protein coding  
125 genes is quantified using the DeltaBS metric. Following scoring, a bootstrap sampling of  
126 genomes are used to train each decision tree. For each node in the tree, a random subset of  
127 genes are sampled, and the most informative gene from this set is chosen to split the data.  
128 For each node in the tree, the predictive utility of the selected gene (variable importance) is  
129 tested by calculating how well the gene separates the samples according to phenotype.

130

131 We then employed random forests to identify the genes which were most informative of  
132 phenotype when viewed collectively. Random forests work by building an ensemble of  
133 decision trees designed to predict a characteristic of the samples [31], in this case  
134 adaptation to an extraintestinal, or invasive, niche. For each node in the decision tree, the  
135 best gene of a random sampling from the training gene set is selected according to its ability  
136 to separate a randomly selected subset of samples by phenotype based on DeltaBS values.  
137 The process of building a random forest produces measures of variable importance that can  
138 be used to assess the relative utility of different genes in classification of *Salmonella* strains  
139 based on lifestyle.

## 140 ***A small subset of genes are strongly predictive of invasiveness in Salmonella***

141 To obtain an indication of the proportion of the genome that shows patterns of unusual  
142 sequence variation associated with an invasive phenotype, we trained a random forest  
143 model on a set of 6,438 orthologous genes. Accuracy of the model was assessed using out-

144 of-bag accuracy. This out-of-bag (OOB) measure of accuracy gives us an indication of how  
145 well each decision tree in the forest performs at predicting phenotype in a serovar it has  
146 never encountered before, using information on DeltaBS differences collected from other  
147 serovars. Next, we performed iterative feature selection to improve the performance of the  
148 model. This process involved repeated rounds of selecting the top 50% of predictors and re-  
149 training the model, until the model achieved perfect OOB predictive performance on the  
150 training dataset (Fig 2A). When the full set of filtered orthologous genes was used to build a  
151 model, a subset of genes ranked much higher than the others in variable importance (VI)  
152 (Fig 2B). We then saw a tailing off of VI, resulting in 4,721 orthologous groups either not  
153 being used in the model, or not improving classification accuracy (as indicated by VI = 0).  
154 This set of genes was discarded in the the first round of feature selection, and a subsequent  
155 1,521 genes were discarded in the subsequent three rounds. The final model used 196 of  
156 the original 6,438 genes for prediction (S2 Table). This model additionally achieved perfect  
157 classification accuracy on an independent set of genomes of the same serovars as our  
158 training data (Fig S1). We tested for overfitting using permutation tests, and for correlation  
159 bias [32] using a variety of alternative model building strategies, and found no evidence for  
160 either phenomenon in our model (File S1).

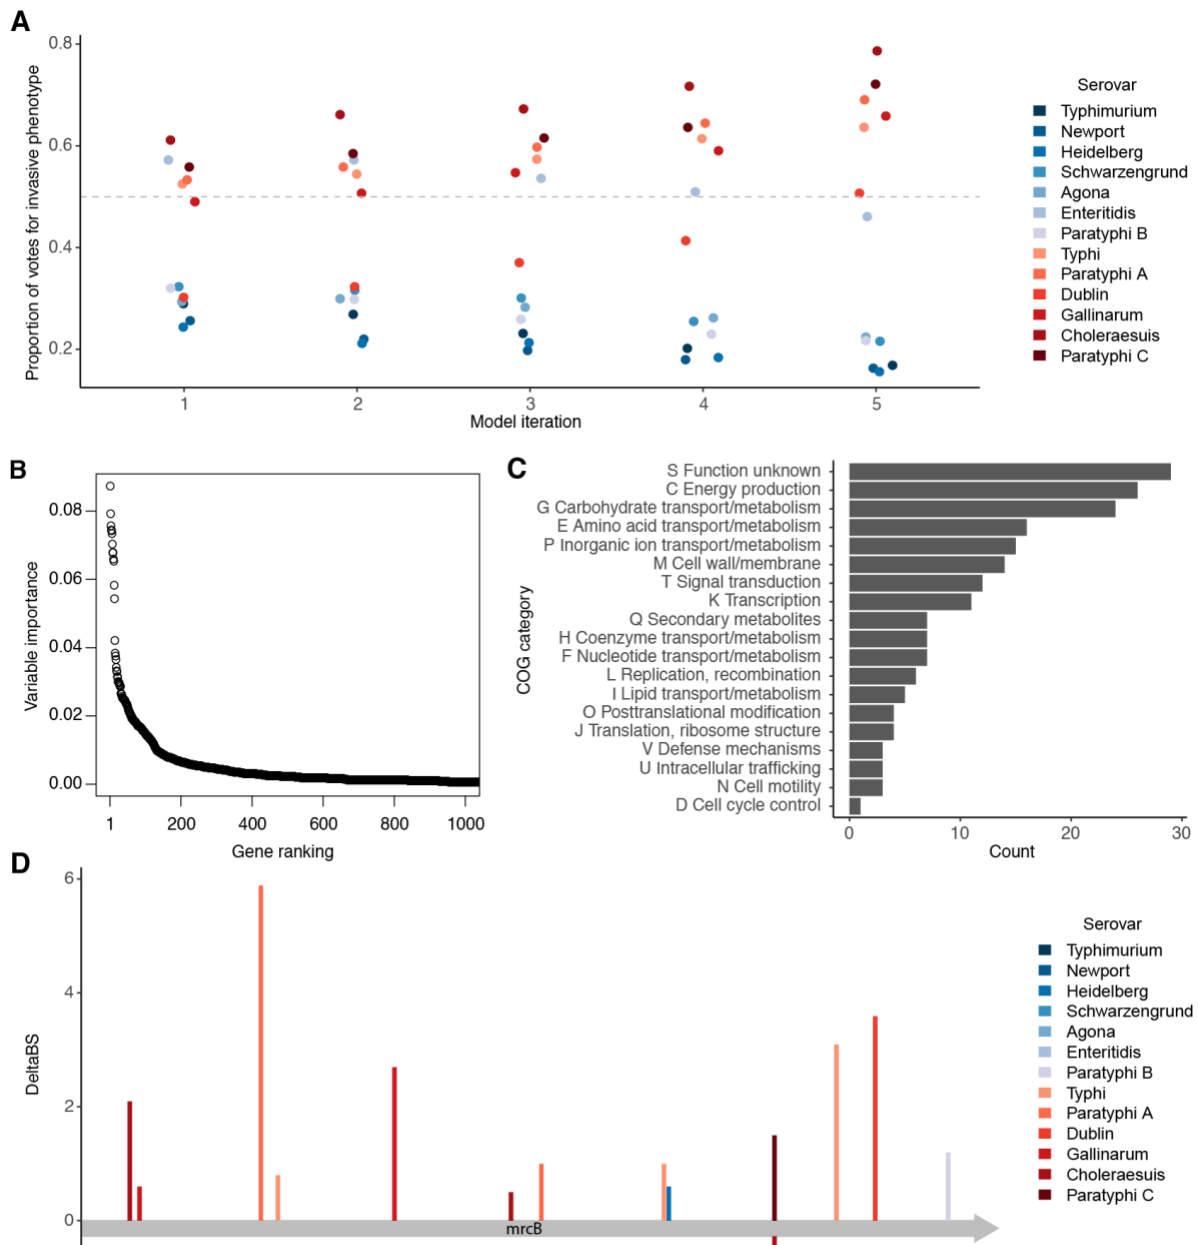

161

162 **Fig 2 | A subset of *Salmonella* genes are strongly indicative of invasive potential**

163 A: Out-of-bag votes for phenotype of each serovar cast by each model. Model 1 is the model

164 built using all predictor variables, then each successive model was built using sparsity

165 pruning from the previous model's predictor variables. Model 5 is the final model with 100%

166 accuracy. Out-of-bag votes include only those votes cast by trees that were not trained on a

167 given sample. The dashed grey line indicates the voting threshold to classify an isolate as

168 invasive. Invasive serovars are coloured in red and gastrointestinal serovars are coloured in

169 blue.



170 B: Of all genes used in the original training dataset, a small minority are given high  
171 importance in identifying invasive strains. Variable importance is shown for the top 1000  
172 genes used in the original training set. Variable importance was measured as average  
173 decrease in Gini index in a random forest model trained on all orthologous groups that met  
174 the inclusion criteria (N = 6,438).

175 C: Functional categories associated with the top predictive genes.

176 D: Mutations in *mrcB* (penicillin-binding protein 1b), one of the top three predictors.  
177 Mutations in different strains are colour-coded, with bars in red indicating a mutation in an  
178 extraintestinal strain and bars in blue indicating a mutation in a gastrointestinal strain. An  
179 estimate of the effect of the mutation on protein function (DeltaBS) is shown on the y-axis,  
180 with positive values indicating higher chance of a mutation impacting protein function. The x-  
181 axis represents the length of the protein.

## 182 ***Predictive genes are typically degraded or absent in invasive isolates***

183 We anticipated that the majority of informative genes identified in our study would be genes  
184 that showed functional degradation in invasive isolates but not in gastrointestinal isolates. Of  
185 the top predictors in our study (N = 196), 154 showed significantly greater mutational burden  
186 in extraintestinal strains compared to gastrointestinal strains (Mann-Whitney U test, adjusted  
187 *P*-value < 0.05), compared to 9 genes that showed significantly greater mutational burden in  
188 gastrointestinal strains. Of the genes that were more conserved in invasive isolates, one was  
189 the aldo-keto reductase *yakC*, which was deleted or truncated in all but one gastrointestinal  
190 strain and intact in all invasive strains. Another was the chaperone protein *yajL*, which  
191 appears to be important for oxidative stress tolerance [33,34].

192

193 Among the top predictors were several sets of genes belonging to the same operon (S2  
194 Table). Examples included the *ttr*, *cbi* and *pdu* operons, which are all required for the  
195 anaerobic metabolism of 1,2-propanediol [35]. These operons have previously been  
196 identified as key degraded pathways in invasive isolates [16–18], and indicate the

197 agreement of this method with other studies linking loss of gene function to host niche.  
198 Overall, a large proportion of the identified genes were involved in metabolism (Fig 2C),  
199 consistent with the findings of similar studies [17,18]. Of the 167 central metabolism genes  
200 identified by Nuccio and Bäumlér (2014) as truncated or deleted in at least one  
201 extraintestinal serovar, only one of these was previously reported to be truncated in > 4  
202 serovars. In contrast, we found that 20 of the 167 central metabolism genes were identified  
203 by our model as informative of phenotype, indicating that including signal from more subtle  
204 forms of loss of function improves our ability to detect parallelism across lineages of invasive  
205 *Salmonella*. Of the 13 genes reported to be frequently disrupted by Nuccio and Bäumlér, our  
206 approach identified 9. The other 4 were either not a match to profile HMMs in our database,  
207 or the truncation did not fall within the span of the model. Other major categories affected  
208 include proteins involved in cell wall and membrane function, perhaps suggesting changes  
209 affecting recognition by the host immune system, and signal transduction, suggesting some  
210 degree of consistent regulatory rewiring during adaptation to an extraintestinal niche.

211

212 Information provided by multiple genes was often more informative of phenotype than a  
213 single gene individually, as was the case for *fimD* and *fimH* (Fig S2). FimD and FimH  
214 constitute central components of type 1 pili, and both are required for expression of normal  
215 fimbriae [36]. This demonstrates that our approach is capable of identifying epistatic  
216 relationships between genes, where a modification in function of one gene masks the  
217 functional status of the other.

218 ***Sequence changes in key indicator genes involve independent mutations in each***  
219 ***serovar, contributing to similar functional outcomes***

220 When examining individual genes that showed differences in mutational burden between  
221 invasive and gastrointestinal isolates, we found that most of these mutations had occurred  
222 independently, and had occurred at different sites in the protein. Using a permissive  
223 threshold (DBS>3), or a conservative threshold (DBS>5), there were close to twice as many

224 deleterious, independent mutations in the genes of the invasive serovars than those of the  
225 gastrointestinal (476:910; 537:991, respectively, see Methods). This phenomenon was even  
226 more pronounced when only mutations with DBS over the upper quartile were counted  
227 (249:612, Table S3). While the majority of genes identified appeared to be cases of gene  
228 degradation in invasive lineages, some genes showed more subtle signs of mutational  
229 burden, restricted to nonsynonymous changes of modest predicted functional impact.

230

231 An example of this, Fig 2D, illustrates mutation accumulation in one of the top candidate  
232 genes, *mrcB*, encoding penicillin-binding protein 1b (PBP1b). Not only does *mrcB* carry more  
233 mutations in invasive serovars compared to gastrointestinal serovars, the mutations have  
234 occurred independently in different positions within the protein. Penicillin-binding proteins are  
235 the major target of  $\beta$ -lactam antibiotics and are important for synthesis and maturation of  
236 peptidoglycan [37]. PBP1b in particular extends and crosslinks peptidoglycan chains during  
237 cell division. While PBP1b is not essential, it has been shown to be synthetically lethal when  
238 the partially redundant *mrcA*/PBP1a is deleted, and is important in *E. coli* for competitive  
239 survival of extended stationary phase, osmotic stress [38], and — in *Salmonella* Typhi —  
240 growth in the presence of bile [39]. Bile is an important environmental challenge for  
241 *Salmonella*, particularly for extraintestinal serovars which colonize the gall bladder [40].  
242 While there are more mutations in invasive than in gastrointestinal serovars, the mutations  
243 that occur in this protein are all amino acid substitutions of modest predicted impact. This  
244 suggests that sequence changes could result in a modification of protein function, rather  
245 than a loss, consistent with the importance of PBP1b for the survival of *S. Typhi* during a  
246 typical infection cycle [39].

#### 247 ***S. Dublin* and *S. Enteritidis* serovars are more difficult to classify than others**

248 To anticipate the performance of our random forest model on new data we computed out-of-  
249 bag (OOB) error. Because random forests train each decision tree on a random subset of  
250 the training data, OOB error can be computed by testing the performance of these trees on

251 data they have not been trained on, providing inbuilt cross-validation [31]. In our case,  
252 perfect OOB classifications were only achieved by the fifth iteration of the model. The need  
253 for iterative improvement of the model came from difficulty in correctly classifying the  
254 reference strains for serovars Enteritidis and Dublin. This is reflective of their relatively  
255 recent divergence and niche adaptation compared to other serovars in the study (Fig S3,  
256 Langridge et al. 2015). *S. Gallinarum* was classified much more readily than *S. Enteritidis*  
257 and *S. Dublin*, despite being closely related to both serovars, perhaps due to its host  
258 restriction.

259

260 *S. Enteritidis* was initially mis-classified as invasive, indicating that it shares genomic trends  
261 with invasive lineages. Genomic analyses have indicated that the ancestor of *S. Enteritidis*  
262 previously possessed intact pathogenicity islands (SPI-6 and SPI-19), each encoding a type  
263 six secretion system [18,41]. These loci have been implicated in host-adaptation and survival  
264 during extraintestinal infection [42,43], and it has been speculated based on their loss and  
265 other evidence that classical *S. Enteritidis* has been adapting towards greater host  
266 generalism with respect to its ancestral state [18]. This could explain the greater number of  
267 disrupted and deleted genes relative to other gastrointestinal serovars used in this study,  
268 and the difficulty in classifying it correctly. Conversely, *S. Dublin* was initially mis-classified  
269 as gastrointestinal. In previous studies *S. Dublin* has been shown to possess fewer  
270 pseudogenes than related invasive isolates [17,18], suggesting a lower degree of host  
271 adaptation than other invasive isolates. Indeed, *S. Dublin* is more promiscuous in its host  
272 range, primarily infecting cattle [44] while still causing sporadic human disease [45]. It seems  
273 likely that a subset of informative genes identified in early iterations of the model may have  
274 been indicators of host restriction or generalism rather than broad extraintestinal adaptation.

275 ***Patterns of gene degradation identified in established invasive lineages are present in***  
276 ***novel lineages of S. Typhimurium and S. Enteritidis associated with systemic***  
277 ***infection***

278 In recent years there have been reports of novel *S. Typhimurium* and *S. Enteritidis* lineages  
279 associated with invasive disease in sub-Saharan Africa [46–48] in populations with a high  
280 prevalence of immunosuppressive illness such as HIV, malaria, and malnutrition [49]. These  
281 lineages contribute to a staggering burden of invasive non-typhoidal salmonella (iNTS)  
282 disease, which is responsible for an estimated 3.4 million cases and circa 680,000 deaths  
283 annually [50]. Based on epidemiological analysis, high-throughput metabolic screening of  
284 selected strains, and analysis of pseudogenes it has been suggested that these lineages  
285 may be rapidly adapting to cause invasive disease in the human niche created by  
286 widespread immunosuppressive illness [11,46–48,51].

287

288 Two iNTS-associated lineages have recently been described within serovar *Enteritidis* [48],  
289 geographically restricted to West Africa and Central/East Africa, respectively. Initial  
290 observations have demonstrated that a representative isolate of the Central/East African  
291 clade has a reduced capacity to respire in the presence of metabolites requiring cobalamin  
292 for their metabolism and has lost the ability to colonize a chick infection model [48],  
293 suggesting adaptation to a new host niche. Similarly, two iNTS disease associated lineages  
294 have been described in serovar *Typhimurium* [47], both members of sequence type 313  
295 (ST313), generally referred to as Lineage I and II in the literature. Lineage II appears to have  
296 largely replaced Lineage I since 2004, and it has been suggested this is due to Lineage II  
297 possessing a gene encoding chloramphenicol resistance [47]. Laboratory characterization of  
298 Lineage II strains has shown that they are not host-restricted [52,53], but do appear to  
299 possess characteristics suggestive of adaptation to an invasive lifestyle [54–57], though it is  
300 important to note that this is a complex trait and not easily quantified.

301

302 Given the evidence of adaptation to an invasive niche in these lineages, we asked if  
303 genomics signatures of extraintestinal adaptation we had detected previously could be  
304 detected in iNTS disease associated lineages. To this end, we applied our predictive model  
305 trained on well-characterized extraintestinal strains to calculate an invasiveness index, the  
306 fraction of decision trees in the random forest voting for an invasive phenotype. First, we  
307 compared isolates from African iNTS-associated clades of *S. Enteritidis* (N=233) to a global  
308 collection of isolates generally associated with intestinal infection (N=100) [48].

309

310 Our model gave iNTS-associated *S. Enteritidis* strains a higher invasiveness index than the  
311 globally distributed isolates (Fig 3A,B, Table S4), indicating the presence of genetic changes  
312 paralleling those that have occurred in extraintestinal serovars of *Salmonella*. Similar gene  
313 signatures were only rarely observed in the global epidemic clade (Fig 3C). These findings  
314 are consistent with the metabolic changes observed by Feasey et al. [48] in the  
315 Central/Eastern African clade compared to the global epidemic clade. In particular we found  
316 signs of gene sequence variation uncharacteristic of gastrointestinal *Salmonella* across a  
317 number of key genomic indicators, including *tcuR*, *ttrA*, *pocR*, *pduW*, *eutH*, SEN2509 (a  
318 putative anaerobic dimethylsulfoxide reductase) and SEN3188 (a putative tartrate  
319 dehydratase subunit), all in pathways previously identified by Nuccio and Bäumlér [17] as  
320 being involved in the utilization of host-derived nutrients in the inflamed gut environment.  
321 This indicates that our model is able to identify early signatures of adaptation, even in these  
322 recently emerged strains that still retain some capacity to cause enterocolitis [48].

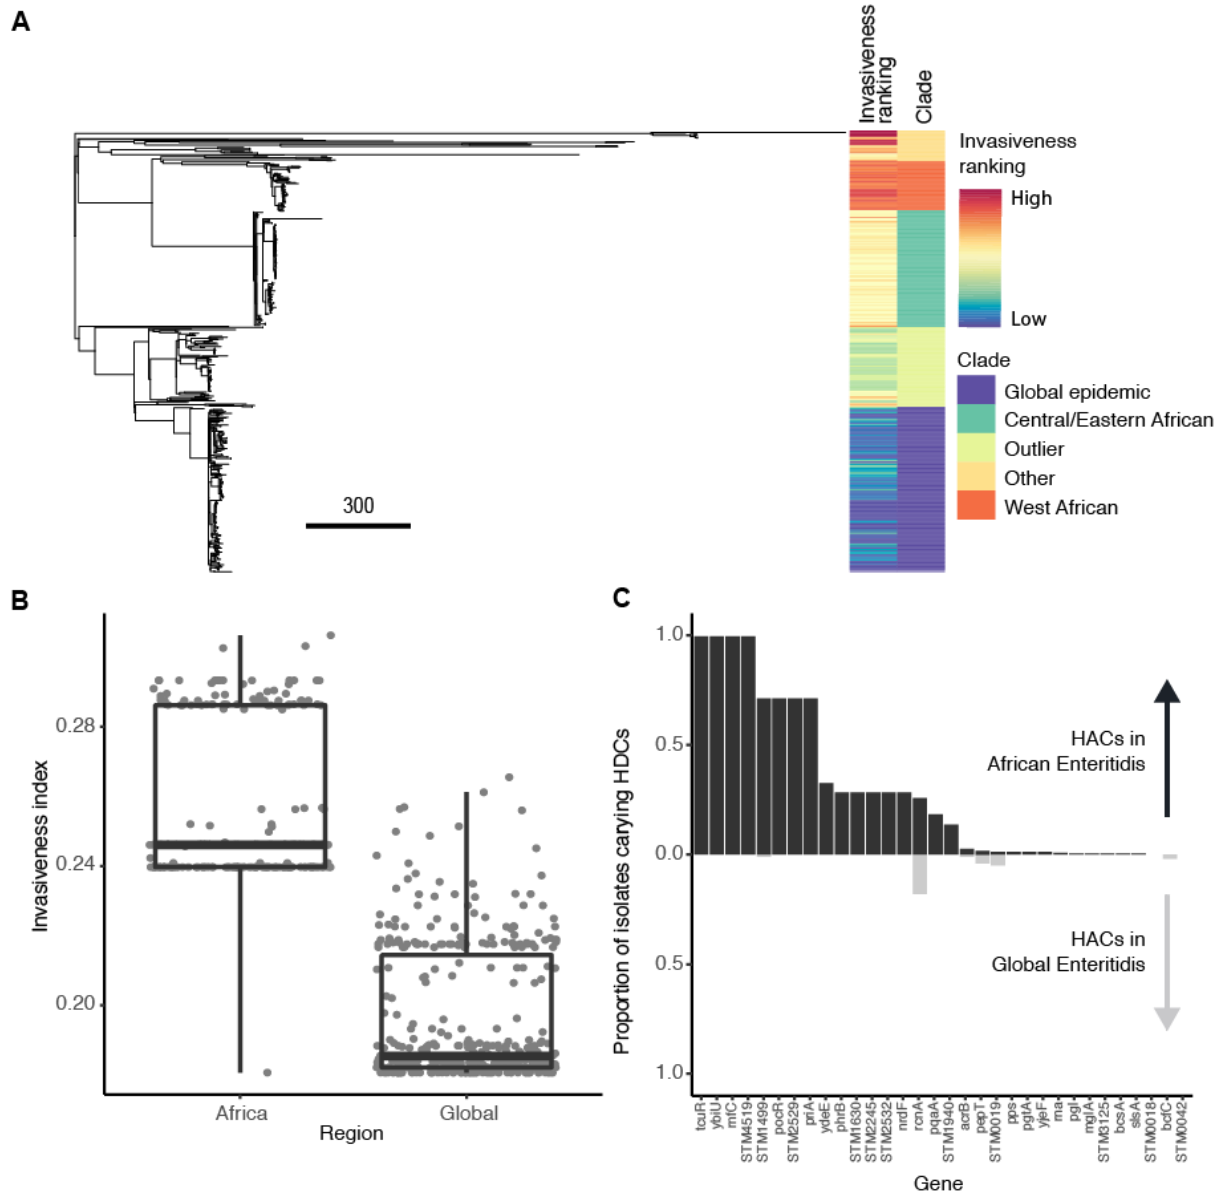

323  
324

325 **Fig 3 | Voting of the model on African iNTS and global gastrointestinal isolates**

326 A: Maximum likelihood phylogeny of all *S. Enteritidis* isolates included in the study,  
327 annotated with invasiveness ranking and clade (note: Outlier refers to the distinct sister  
328 clade of the global epidemic strains identified by [48], while Other refers to strains that don't  
329 belong to a named clade).

330 B: Invasiveness indices for African and non-African clades of *Salmonella*. Lower and upper  
331 boundaries of the boxplots correspond to the 25th and 75th quantiles.

332 C: The proportion of isolates from each tested dataset carrying a hypothetically attenuated  
333 coding sequence (HAC, defined by a  $\Delta$ DeltaBS>3 relative to the reference serovar). Genes

334 are ordered by the amount of degradation observed in African clades. African strains are  
335 shown in the positive y-axis in darker grey, global strains are shown in the negative y-axis in  
336 lighter grey.

337

338 To confirm this, we performed an additional comparison of *S. Typhimurium* ST313 isolates  
339 (N=208), to global isolates from other STs, predominantly ST19, associated with

340 gastroenteritis (N=51) [51,58]. Similarly to iNTS associated *S. Enteritidis* isolates, *S.*

341 *Typhimurium* ST313 isolates has a higher invasiveness index than isolates from other STs

342 (Fig S4, Table S5). Within ST313, Lineage II scored higher than Lineage I, possibly

343 suggesting differential adaptation to the extraintestinal niche. We found that there were in

344 fact more degraded genes unique to Lineage I than Lineage II, but that these genes were

345 assigned less weight in the model, so did not impact score as strongly (Figure S2 & S3).

346 Interestingly, ST313 has recently been shown not to be entirely restricted to Africa, with

347 isolation reported in Brazil [59] and the UK [58], associated primarily with gastrointestinal

348 disease. We included a collection of UK ST313 strains [58] in our analysis, and found that

349 their invasiveness index tended to be elevated compared to non-ST313 salmonellae, and

350 intermediate between Lineage I and II, suggesting that this adaptation is not restricted to

351 circulating African strains, as it can be seen in strains collected from other countries as well

352 (Fig S5). This observation is consistent with the work of Ashton et al., who noted shared

353 pseudogenes and phenotypic traits in UK and African ST313 isolates. This suggests our

354 model is capturing features here associated with the ability to colonize an extraintestinal

355 niche, rather than enter it in healthy individuals.

356

357 In addition to the iNTS lineages we investigated, some other strains had unusually high

358 invasiveness indices. Among the top scoring isolates outside of the African *S. Enteritidis*

359 lineages are Ratin strains, a rodenticidal lineage used as commercial rat poison before the

360 1960s [60]. In *S. Typhimurium*, a clade containing strains DT99, DT56 and U313 also scored



361 highly. These strains appear to be adapted to birds, and DT99 and DT56 have been  
362 reported to be highly virulent in pigeons [12,61–63].

363

364 While the above data suggests that our model is detecting genetic changes associated with  
365 extraintestinal survival, it is difficult to infer directionality from large isolate collections. We  
366 have addressed this using a unique case of accelerated adaptation over the course of a  
367 single infection (Fig 4). We scored the invasiveness index of a collection of hypermutator *S.*  
368 Enteritidis isolates collected over a ten year period that were adapting to chronic systemic  
369 infection of an immunocompromised patient [10]. We found a significant positive correlation  
370 between invasiveness index and duration of carriage ( $r=0.96$ ,  $n=6$ ,  $P=0.002$ ). Additionally,  
371 there was a significant shift over time in the DeltaBS distribution for the genes in our model  
372 as compared to the rest of the genome ( $P=7.576e-05$ , Mann Whitney U test). This suggests  
373 a specific change in selective pressure on genes inferred to be important for extraintestinal  
374 survival from established invasive serovars, and provides evidence for parallel adaptation.

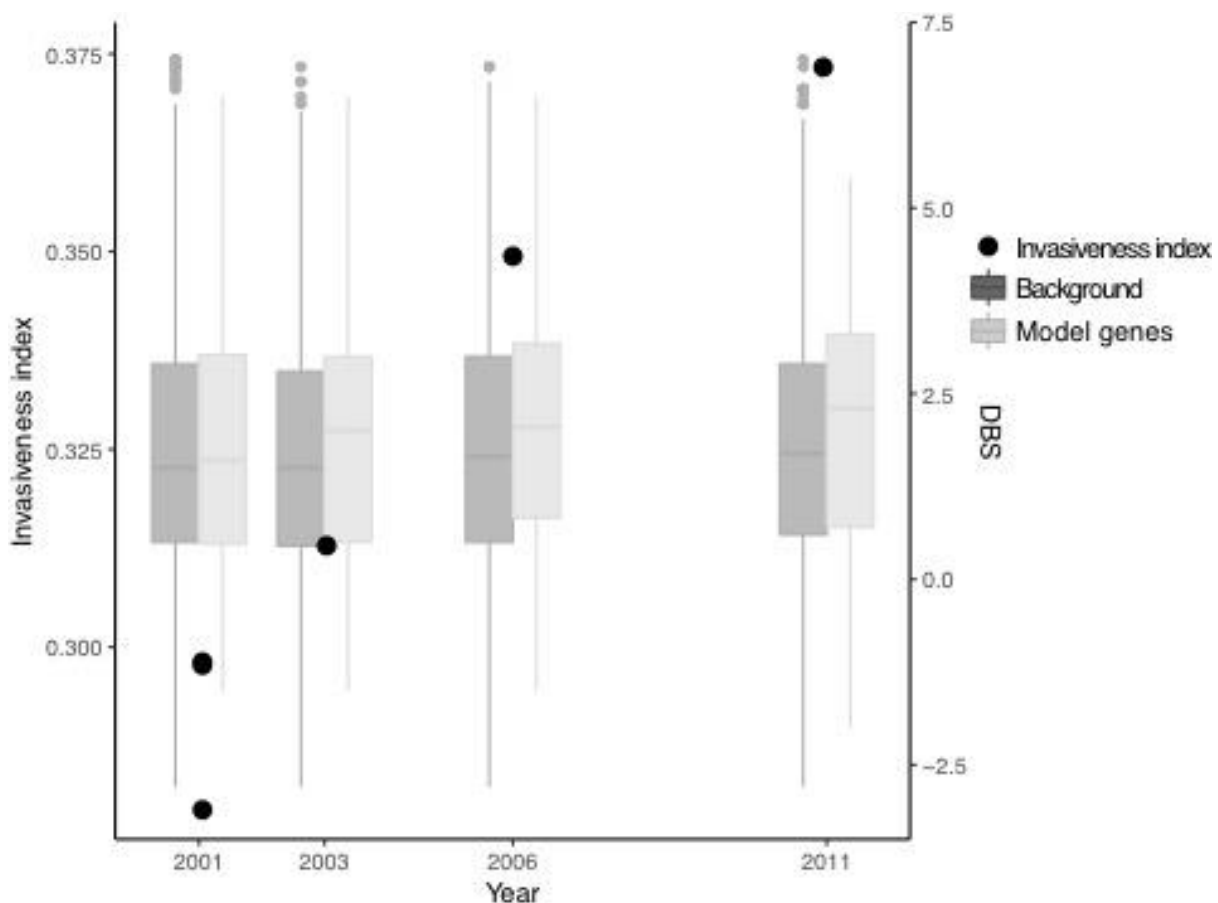

375

376 Figure 4 | Invasiveness indices and DeltaBS (DBS) values for isolates collected during long  
377 term invasive infection of an immunocompromised patient (Klemm et al. 2016). Black points  
378 show the increase in the invasiveness index over time. Boxplots show a significant shift in  
379 DBS distribution over the duration of carriage for genes selected by our model built from  
380 well-characterised invasive serovars as compared to the rest of the proteome. Isolates from  
381 [\[10\]](#). DBS distributions for 2001 have been pooled, but are representative for all three  
382 isolates individually. The y-axis for DBS values has been truncated for better visualisation.

### 383 **Discussion**

384 Parallel evolution appears to be common in niche adaptation, which allows us to identify  
385 genes that are important for survival in different environments [64]. Parallelism has been  
386 observed across vastly different time scales in adapting pathogens. Parallel evolution in the  
387 distantly related genera *Salmonella* and *Yersinia* during adaptation to invasive infection of  
388 the human host has led to independent losses of the *ttr*, *cbi* and *pdu* genes, important for  
389 anaerobic metabolism during intestinal infection [5]. Within genera, parallelism has been  
390 observed when distinct lineages acquire similar virulence factors leading to similar  
391 phenotypes, as with *Yersinia pseudotuberculosis* and *enterocolitica* [8], or the repeated  
392 emergence of the *Shigella* phenotype within the *Escherichia* [6]. Even on the scale of a  
393 single human lifetime, parallel adaptation has been observed in *Pseudomonas aeruginosa*  
394 lineages adapting to infection of the lungs of children with cystic fibrosis [9], or a  
395 hypermutator strain of *Salmonella* adapting to an immunocompromised host [10]. With  
396 pathogen sequencing for disease surveillance becoming increasingly routine [65–67], we  
397 have the opportunity to search for signals of parallel evolution as new pathogens emerge, or  
398 old pathogens expand into new niches.

399

400 Here, we have developed an approach for automatically learning which genes contribute to  
401 this parallel adaptation. Leveraging the DeltaBS functional variant scoring approach we  
402 developed previously [21] allowed us to construct scores which integrate independent

403 mutations and indels that impact gene function. Using these scores, we were able to  
404 construct a classifier model which is able to separate *Salmonella* serovars adapted to an  
405 extraintestinal niche from gastrointestinal strains. Importantly, the random forest classifier  
406 that we used produces interpretable lists of genes involved in this adaptation, which agree  
407 with results in the literature attained through manual curation of pseudogenes. Additionally,  
408 we have shown that this classifier is able to identify nascent signatures of adaptation in  
409 strains of *Salmonella* which have been evolving in response to large populations of  
410 immunocompromised patients in resource-poor nations.

411

412 Other automated approaches to detecting adaptation have been developed which search for  
413 SNPs [68] or words [69,70] associated with phenotype. These approaches, termed microbial  
414 genome-wide association studies (GWASs), have used techniques adapted from human  
415 GWASs, but better cater to methodological issues that arise due to the differences between  
416 human and bacterial inheritance patterns. Major differences impacting analyses are stronger  
417 linkage disequilibrium (LD) between genetic variants in bacterial genomes, greater  
418 population stratification, and often stronger selection for traits [71]. Greater LD and  
419 population stratification often result in traits being linked closely with particular lineages, and  
420 a large number of variants unique to a lineage being spuriously associated with phenotype.  
421 Correction for population stratification allows greater discrimination of true and false positive  
422 associations, but results in a substantial loss of power to detect true positives [71],  
423 particularly in phenotypes that are highly polygenic and are not under strong positive  
424 selection [72]. This can be corrected by increasing the sample size of the study, but  
425 increasing sample size can make measurement of complex phenotypes infeasible [23].

426

427 A number of machine learning approaches to predicting phenotype from genotypic  
428 information have also been recently developed. A notable example is a Support Vector  
429 Machine (SVM) based approach to predicting host range in *Salmonella enterica* and  
430 *Escherichia coli* [73], as it has a similar aim of predicting strains with a higher probability of

431 causing severe disease. We have taken a markedly different approach to other machine  
432 learning based studies, primarily in our use of few, distantly related training examples, rather  
433 than densely sampled strains across a narrower phylogenetic distance. This is because we  
434 wanted to prevent over-fitting of the model through the inclusion of predictors that were  
435 informative of phylogeny rather than phenotype, and we wanted an accurate estimation of  
436 predictive error, which cannot be achieved using traditional cross-validation when there is a  
437 strong correlation structure in a dataset [74]. We have also taken additional steps to examine  
438 the genes and criteria used by the model to make predictions, and have presented these in  
439 Supplemental Table S2, in order to aid the reader's understanding of how the model makes  
440 predictions, and what this teaches us about the biology of this phenotype.

441

442 The use of DeltaBS output as training variables differs from current approaches by allowing  
443 the estimation of the combined effects of variants, both common and rare, on gene function.  
444 The weighting scheme can also combine data on gene presence/absence, indels and SNPs  
445 into a single metric. It significantly reduces the number of association tests that need to be  
446 performed to comprehensively capture much of the genetic diversity in a species, increasing  
447 power to detect associations, and reducing the requirement for such large sample sizes. The  
448 approach also aids in identifying genetic variants that are most likely to have a phenotypic  
449 effect within LD blocks. The DeltaBS variant scoring approach can be readily applied to large  
450 datasets, and could be employed in a linear mixed model (LMM) based association testing  
451 framework [68], or used in a hybrid LMM-random forest based approach [75] to preserve the  
452 ability of the metric to detect epistasis between genes [26].

## 453 **Conclusions**

454 In this study, we have demonstrated the insight to be gained by the layering of machine  
455 learning approaches to better understand niche adaptation in a bacterial pathogen. Firstly,  
456 profile hidden Markov models allow us to capture information on common patterns of

457 sequence variation in protein families in order to understand the functional significance of  
458 specific mutations. Using data on the accumulation of functionally impactful mutations across  
459 the proteome as input, random forests then allow us to identify genes that display a  
460 difference in selective pressures between lineages with different phenotypes. Not only has  
461 this approach proved effective at identifying biological mechanisms behind bacterial niche  
462 adaptation, it has also allowed us to detect the emergence of new extraintestinal lineages by  
463 searching for these recurrent patterns of mutation accumulation in a way that allows the  
464 recognition of novel mutations as cases of the same underlying shift away from the  
465 sequence constraints a gene is usually subjected to. We believe this general approach will  
466 be broadly applicable to any pathogen where multiple lineages are adapting to the same  
467 niche, and will be able to detect signatures of adaptation that are missed by other methods.

## 468 **Methods**

### 469 ***Genome data and identification of orthologs***

470 High quality genomes for 13 well-characterised *Salmonella enterica* serovars were retrieved  
471 from the NCBI database (accessions and serovar information can be found in S1 Table).  
472 The serovars were divided into gastrointestinal and extraintestinal serovars according to the  
473 classifications made by Nuccio and Bäumler [17]. Ortholog calls were also taken from the  
474 Supplementary Material of Nuccio and Bäumler [17]. A core gene phylogeny for the strains  
475 used to build the model was produced using RAxML [76], based on a core gene alignment  
476 created in Roary [77].

### 477 ***Measuring the divergence of genes from predicted sequence constraints***

478 Profile hidden Markov models (HMMs) for Gammaproteobacterial proteins were retrieved  
479 from the eggNOG database [30]. We chose this source of HMMs because it is publicly  
480 available, allowing for better reproduction of analyses, and we feel it provides a good  
481 balance between collecting enough sequence diversity to capture typical patterns of

482 sequence variation in a protein, without sacrificing sensitivity in the detection of deleterious  
483 mutations, as we have observed with Pfam HMMs [21]. Each protein sequence was  
484 searched against the HMM database using hmmsearch from the HMMER3.0 package  
485 (<http://hmmer.org>). The top scoring model corresponding to each protein was used for  
486 analysis (N = 8,060 groups). Orthologous groups (OGs) with no corresponding eggNOG  
487 HMM, or more than one top model hit were excluded from further analysis (N = 1,524). If  
488 most genes in an OG had a significant hit (E-value<0.0001) to the same eggNOG model,  
489 any genes within this OG that did not were assigned a score of zero, reflecting a loss of the  
490 function of that protein. These cases typically reflected a truncation that had occurred early  
491 in the protein sequence. Additionally, genes with no variation in bitscore for the match  
492 between protein sequences and their respective eggNOG HMM across isolates were  
493 excluded (N = 188). After this filtering process, 6,439 orthologous groups remained for  
494 analysis. Residue-specific DeltaBS (as in Fig 2D) was calculated by aligning orthologous  
495 sequences, choosing a reference sequence (from *S. Typhimurium*), and substituting each  
496 variant match state and any accompanying insertions into the reference sequence and  
497 calculating the difference in bitscore caused by the substitution.

#### 498 ***Training a random forest classifier***

499 The R package “randomForest” [78] was used to build random forest classifiers using a  
500 variety of parameters to assess which were best for accuracy. We used out-of-bag (OOB)  
501 error rate to measure the performance of the model [31]. Out-of-bag error is calculated  
502 automatically by the randomForest R package as the model is built. Briefly, calculations are  
503 performed as follows: as each decision tree is trained using a bootstrap sampling of the  
504 training genomes, a small number of samples are left aside to test the predictive accuracy of  
505 each decision tree on previously unseen samples. For each serovar, votes are collated and  
506 accuracy is calculated from only those decision trees that did not include the serovar in their  
507 training set. In this application, this step tests whether the genomic signatures of  
508 invasiveness captured by the decision trees based on some serovars are present in other

509 serovars, and thus whether the model can detect adaptation to an invasive lifestyle in  
510 previously unseen lineages. OOB error rate, stabilised at 10,000 trees, so we chose this as a  
511 parameter for optimising the number of genes sampled per node (mtry). mtry values of 1,  
512  $p/10$ ,  $p/5$ ,  $p/3$ ,  $p/2$  and  $p$  (where  $p$  = the number of predictors) were tested, and we found that  
513 at  $mtry=p/10$ , the number of genes that were either not incorporated into trees, or did not  
514 improve the homogeneity of daughter nodes when they were incorporated into trees (as  
515 measured by mean decrease in Gini index, [79]) stabilised at ~92%. Training the random  
516 forest classifier over five iterations took 55 seconds on a laptop computer. In order to assess  
517 how well this method would scale, we trained another model on a larger dataset of *S.*  
518 *Enteritidis* strains (N=677) using the same workflow and site of isolation as a proxy for  
519 phenotype, which took 28 minutes.

520

521 To improve the performance of the model, we performed five model building and sparsity  
522 pruning cycles. For the first cycle, we built a random forest model using all genes that met  
523 the inclusion criteria, and performed sparsity pruning by eliminating all variables that had a  
524 mean Gini index (variable importance) of zero or lower (meaning the gene was either not  
525 included in the model or did not improve model accuracy when it was). Four successive  
526 rounds of model building and sparsity pruning involved building a new model with the pruned  
527 dataset, then pruning the genes with the lowest 50% of variable importances. The resulting  
528 model had 100% out-of-bag classification accuracy. We also tested the accuracy of the full  
529 model on a collection of alternative strains related to the training dataset (see Table S1).  
530 Orthologs to the top genes identified by our model were identified using phmmer from the  
531 HMMER3.0 package (<http://hmmer.org>). Additional notes on model building and testing are  
532 provided in File S1.

533

534 We tested the top 196 genes for the presence of independent mutations in each serovar by  
535 aligning each sequence to the profile HMM representing that protein family. Variation in each  
536 sequence with respect to a designated reference sequence from the set (as selected by

537 Nuccio and Bäumler, 2014) at each site in the HMM was identified and classified as either a  
538 mutation unique to a single serovar, or one shared among multiple serovars. Consecutive  
539 deletions or insertions with respect to the HMM consensus sequence were collapsed into  
540 single mutational events.

#### 541 ***Invasive non-typhoidal Salmonella analysis***

542 Read data from Feasey et al. [48] and Klemm et al [10] was mapped to the reference  
543 genome *S. Enteritidis* P125109. Reads from Okoro et al. [51] and Ashton et al. [58] were  
544 mapped to the reference genome *S. Typhimurium* LT2. For samples in the Okoro study, if an  
545 isolate was sequenced using multiple runs, the most recent run was chosen for analysis. All  
546 reads were mapped using BWA mem [80] and regions near indels were realigned using  
547 GATK [81]. Picard (<http://broadinstitute.github.io/picard>) was used to identify and flag optical  
548 duplicates generated during library preparation. SNPs and indels were called using samtools  
549 v1.2 mpileup [82], and were filtered to exclude those variants with coverage <10 or quality  
550 <30. For tree building, a pseudogenome was constructed by substituting high confidence  
551 (coverage >4, quality >50) variant sites in the reference genome, and masking any sites with  
552 low confidence with an “N”. Insertions relative to the reference genome were ignored, and  
553 deletions were filled with an “N”. Pseudogenome alignments were then used as input to  
554 produce trees using Gubbins [83] to exclude recombination events, and RAxML v8.2.8 [76]  
555 to build maximum likelihood trees using a GTR + Gamma model. Samples with >10%  
556 missing base calls were excluded from the analysis.

557

558 Sequences for the 196 genes of interest used in the random forest model were retrieved for  
559 each isolate and translated. These were then scored using their respective profile HMMs.  
560 Score data was collated, and any missing values were marked as ‘NA’ and imputed using  
561 the `na.roughfix` function from the `randomForest` R package [78]. This is a different approach  
562 used to that of the training dataset, due to the potentially lower quality of the sequenced  
563 genomes leading to gene absence due to low coverage rather than true deletion or severe



564 truncation. The relationship between invasiveness ranking and phylogeny were visualised  
565 using Phandango [84].

### 566 **Data availability**

567 All genome sequence data are publicly available, and accessions are provided in the  
568 appropriate Supplemental Tables. Code and data for reproducing this analysis, performing  
569 an equivalent analysis using new data, and assessing the invasiveness index of other  
570 *Salmonella* strains is publicly available at  
571 [http://www.github.com/UCanCompBio/invasive\\_salmonella](http://www.github.com/UCanCompBio/invasive_salmonella).

### 572 **Funding information**

573 NEW was supported by a PhD scholarship from the University of Canterbury, a Biomolecular  
574 Interaction Centre Postdoctoral Fellowship, and the Wellcome Trust grant 206194. LB was  
575 supported in part by a Research Fellowship from the Alexander von Humboldt  
576 Stiftung/Foundation. NEW and PPG are supported by a Rutherford Discovery Fellowship  
577 administered by the Royal Society of New Zealand, the Bioprotection Research Centre and  
578 the National Science Challenge “NZ’s Biological Heritage”.

### 579 **Acknowledgements**

580 We are grateful to Sean Eddy for useful discussions and providing fast, accurate and free  
581 software, and to Simon Harris for developing the pipeline used for mapping reads and calling  
582 SNPs for the iNTS portion of our analysis. We also thank Julian Parkhill, Nick Feasey, Nick  
583 Thomson, Alexander Westermann, Stan Gorski, and John Crump for their helpful feedback.

### 584 **References**

- 585 1. Frank SA, Schmid-Hempel P. Mechanisms of pathogenesis and the evolution of  
586 parasite virulence. *J Evol Biol.* 2008;21: 396–404.
- 587 2. Fauci AS, Morens DM. The perpetual challenge of infectious diseases. *N Engl J Med.*

- 588 2012;366: 454–461.
- 589 3. Pallen MJ, Wren BW. Bacterial pathogenomics. *Nature*. nature.com; 2007;449: 835–  
590 842.
- 591 4. Loman NJ, Pallen MJ. Twenty years of bacterial genome sequencing. *Nat Rev*  
592 *Microbiol.* 2015;13: 787–794.
- 593 5. McNally A, Thomson NR, Reuter S, Wren BW. “Add, stir and reduce”: *Yersinia* spp. as  
594 model bacteria for pathogen evolution. *Nat Rev Microbiol.* 2016;14: 177–190.
- 595 6. The HC, Thanh DP, Holt KE, Thomson NR, Baker S. The genomic signatures of  
596 *Shigella* evolution, adaptation and geographical spread. *Nat Rev Microbiol.* nature.com;  
597 2016; doi:10.1038/nrmicro.2016.10
- 598 7. Merhej V, Georgiades K, Raoult D. Postgenomic analysis of bacterial pathogens  
599 repertoire reveals genome reduction rather than virulence factors. *Brief Funct*  
600 *Genomics.* 2013;12: 291–304.
- 601 8. Reuter S, Connor TR, Barquist L, Walker D, Feltwell T, Harris SR, et al. Parallel  
602 independent evolution of pathogenicity within the genus *Yersinia*. *Proc Natl Acad Sci U*  
603 *S A.* 2014;111: 6768–6773.
- 604 9. Marvig RL, Sommer LM, Molin S, Johansen HK. Convergent evolution and adaptation  
605 of *Pseudomonas aeruginosa* within patients with cystic fibrosis. *Nat Genet.* 2015;47:  
606 57–64.
- 607 10. Klemm EJ, Gkrania-Klotsas E, Hadfield J, Forbester JL, Harris SR, Hale C, et al.  
608 Emergence of host-adapted *Salmonella* Enteritidis through rapid evolution in an  
609 immunocompromised host. *Nat Microbiol.* 2016;1: 15023.
- 610 11. Feasey NA, Dougan G, Kingsley RA, Heyderman RS, Gordon MA. Invasive non-  
611 typhoidal salmonella disease: an emerging and neglected tropical disease in Africa.  
612 *Lancet.* 2012;379: 2489–2499.
- 613 12. Rabsch W, Andrews HL, Kingsley RA, Prager R, Tschäpe H, Adams LG, et al.  
614 *Salmonella enterica* serotype Typhimurium and its host-adapted variants. *Infect Immun.*  
615 2002;70: 2249–2255.
- 616 13. Bäumler A, Fang FC. Host specificity of bacterial pathogens. *Cold Spring Harb*  
617 *Perspect Med.* 2013;3: a010041.
- 618 14. Parkhill J, Dougan G, James KD, Thomson NR, Pickard D, Wain J, et al. Complete  
619 genome sequence of a multiple drug resistant *Salmonella enterica* serovar Typhi CT18.  
620 *Nature.* 2001;413: 848–852.
- 621 15. McClelland M, Sanderson KE, Clifton SW, Latreille P, Porwollik S, Sabo A, et al.  
622 Comparison of genome degradation in Paratyphi A and Typhi, human-restricted  
623 serovars of *Salmonella enterica* that cause typhoid. *Nat Genet.* 2004;36: 1268–1274.
- 624 16. Thomson NR, Clayton DJ, Windhorst D, Vernikos G, Davidson S, Churcher C, et al.  
625 Comparative genome analysis of *Salmonella* Enteritidis PT4 and *Salmonella*  
626 *Gallinarum* 287/91 provides insights into evolutionary and host adaptation pathways.  
627 *Genome Res.* 2008;18: 1624–1637.

- 628 17. Nuccio S-P, Bäumlér AJ. Comparative Analysis of Salmonella Genomes Identifies a  
629 Metabolic Network for Escalating Growth in the Inflamed Gut. *MBio*. 2014;5: e00929–  
630 14–e00929–14.
- 631 18. Langridge GC, Fookes M, Connor TR, Feltwell T, Feasey N, Parsons BN, et al.  
632 Patterns of genome evolution that have accompanied host adaptation in Salmonella.  
633 *Proc Natl Acad Sci U S A*. 2015;112: 863–868.
- 634 19. Lerat E, Ochman H. Recognizing the pseudogenes in bacterial genomes. *Nucleic Acids*  
635 *Res*. 2005;33: 3125–3132.
- 636 20. Kuo C-H, Ochman H. The extinction dynamics of bacterial pseudogenes. *PLoS Genet*.  
637 2010;6. doi:10.1371/journal.pgen.1001050
- 638 21. Wheeler NE, Barquist L, Kingsley RA, Gardner PP. A profile-based method for  
639 identifying functional divergence of orthologous genes in bacterial genomes.  
640 *Bioinformatics*. 2016;32: 3566–3574.
- 641 22. Kingsley RA, Kay S, Connor T, Barquist L, Sait L, Holt KE, et al. Genome and  
642 transcriptome adaptation accompanying emergence of the definitive type 2 host-  
643 restricted Salmonella enterica serovar Typhimurium pathovar. *MBio*. 2013;4: e00565–  
644 13.
- 645 23. Dutilh BE, Backus L, Edwards RA, Wels M, Bayjanov JR, van Hijum SAFT. Explaining  
646 microbial phenotypes on a genomic scale: GWAS for microbes. *Brief Funct Genomics*.  
647 2013;12: 366–380.
- 648 24. Pappu V, Pardalos PM. High-Dimensional Data Classification. In: Aleskerov F,  
649 Goldengorin B, Pardalos PM, editors. *Clusters, Orders, and Trees: Methods and*  
650 *Applications*. Springer New York; 2014. pp. 119–150.
- 651 25. Touw WG, Bayjanov JR, Overmars L, Backus L, Boekhorst J, Wels M, et al. Data  
652 mining in the Life Sciences with Random Forest: a walk in the park or lost in the jungle?  
653 *Brief Bioinform*. 2013;14: 315–326.
- 654 26. Wei W-H, Hemani G, Haley CS. Detecting epistasis in human complex traits. *Nat Rev*  
655 *Genet*. 2014;15: 722–733.
- 656 27. Bayjanov JR, Molenaar D, Tzeneva V, Siezen RJ, van Hijum SAFT. PhenoLink--a web-  
657 tool for linking phenotype to ~omics data for bacteria: application to gene-trait matching  
658 for *Lactobacillus plantarum* strains. *BMC Genomics*. 2012;13: 170.
- 659 28. Laabei M, Recker M, Rudkin JK, Aldeljawi M, Gulay Z, Sloan TJ, et al. Predicting the  
660 virulence of MRSA from its genome sequence. *Genome Res*. 2014;24: 839–849.
- 661 29. Alam MT, Petit RA 3rd, Crispell EK, Thornton TA, Conneely KN, Jiang Y, et al.  
662 Dissecting vancomycin-intermediate resistance in staphylococcus aureus using  
663 genome-wide association. *Genome Biol Evol*. 2014;6: 1174–1185.
- 664 30. Huerta-Cepas J, Szklarczyk D, Forslund K, Cook H, Heller D, Walter MC, et al.  
665 eggNOG 4.5: a hierarchical orthology framework with improved functional annotations  
666 for eukaryotic, prokaryotic and viral sequences. *Nucleic Acids Res*. 2016;44: D286–93.
- 667 31. Breiman L. *Random Forests*. Mach Learn. Kluwer Academic Publishers; 2001;45: 5–32.

- 668 32. Tolosi L, Lengauer T. Classification with correlated features: unreliability of feature  
669 ranking and solutions. *Bioinformatics*. 2011;27: 1986–1994.
- 670 33. Kthiri F, Gautier V, Le H-T, Prère M-F, Fayet O, Malki A, et al. Translational defects in a  
671 mutant deficient in YajL, the bacterial homolog of the parkinsonism-associated protein  
672 DJ-1. *J Bacteriol*. 2010;192: 6302–6306.
- 673 34. Le H-T, Gautier V, Kthiri F, Malki A, Messaoudi N, Mihoub M, et al. YajL, prokaryotic  
674 homolog of parkinsonism-associated protein DJ-1, functions as a covalent chaperone  
675 for thiol proteome. *J Biol Chem*. 2012;287: 5861–5870.
- 676 35. Roth JR, Lawrence JG, Bobik TA. Cobalamin (coenzyme B12): synthesis and biological  
677 significance. *Annu Rev Microbiol*. 1996;50: 137–181.
- 678 36. Phan G, Remaut H, Wang T, Allen WJ, Pirker KF, Lebedev A, et al. Crystal structure of  
679 the FimD usher bound to its cognate FimC-FimH substrate. *Nature*. 2011;474: 49–53.
- 680 37. Typas A, Banzhaf M, Gross CA, Vollmer W. From the regulation of peptidoglycan  
681 synthesis to bacterial growth and morphology. *Nat Rev Microbiol*. [ncbi.nlm.nih.gov](http://ncbi.nlm.nih.gov);  
682 2011;10: 123–136.
- 683 38. Pepper ED, Farrell MJ, Finkel SE. Role of penicillin-binding protein 1b in competitive  
684 stationary-phase survival of *Escherichia coli*. *FEMS Microbiol Lett*. 2006;263: 61–67.
- 685 39. Langridge GC, Phan M-D, Turner DJ, Perkins TT, Parts L, Haase J, et al. Simultaneous  
686 assay of every *Salmonella Typhi* gene using one million transposon mutants. *Genome*  
687 *Res*. 2009;19: 2308–2316.
- 688 40. Crawford RW, Rosales-Reyes R, Ramírez-Aguilar M de la L, Chapa-Azuela O,  
689 Alpuche-Aranda C, Gunn JS. Gallstones play a significant role in *Salmonella* spp.  
690 gallbladder colonization and carriage. *Proc Natl Acad Sci U S A*. 2010;107: 4353–4358.
- 691 41. Blondel CJ, Jiménez JC, Contreras I, Santiviago CA. Comparative genomic analysis  
692 uncovers 3 novel loci encoding type six secretion systems differentially distributed in  
693 *Salmonella* serotypes. *BMC Genomics*. 2009;10: 354.
- 694 42. Blondel CJ, Jiménez JC, Leiva LE, Alvarez SA, Pinto BI, Contreras F, et al. The type VI  
695 secretion system encoded in *Salmonella* pathogenicity island 19 is required for  
696 *Salmonella enterica* serotype Gallinarum survival within infected macrophages. *Infect*  
697 *Immun*. 2013;81: 1207–1220.
- 698 43. Mulder DT, Cooper CA, Coombes BK. Type VI secretion system-associated gene  
699 clusters contribute to pathogenesis of *Salmonella enterica* serovar Typhimurium. *Infect*  
700 *Immun*. *Am Soc Microbiol*; 2012;80: 1996–2007.
- 701 44. Kingsley RA, Bäumlér AJ. Host adaptation and the emergence of infectious disease:  
702 the *Salmonella* paradigm. *Mol Microbiol*. 2000;36: 1006–1014.
- 703 45. Harvey RR, Friedman CR, Crim SM, Judd M, Barrett KA, Tolar B, et al. Epidemiology of  
704 *Salmonella enterica* Serotype Dublin Infections among Humans, United States, 1968–  
705 2013. *Emerging Infectious Disease journal*. 2017;23: 1493.
- 706 46. Kingsley RA, Msefula CL, Thomson NR, Kariuki S, Holt KE, Gordon MA, et al. Epidemic  
707 multiple drug resistant *Salmonella Typhimurium* causing invasive disease in sub-  
708 Saharan Africa have a distinct genotype. *Genome Res*. 2009;19: 2279–2287.

- 709 47. Okoro CK, Kingsley RA, Connor TR, Harris SR, Parry CM, Al-Mashhadani MN, et al.  
710 Intracontinental spread of human invasive *Salmonella* Typhimurium pathovariants in  
711 sub-Saharan Africa. *Nat Genet.* 2012;44: 1215–1221.
- 712 48. Feasey NA, Hadfield J, Keddy KH, Dallman TJ, Jacobs J, Deng X, et al. Distinct  
713 *Salmonella* Enteritidis lineages associated with enterocolitis in high-income settings and  
714 invasive disease in low-income settings. *Nat Genet.* 2016;48: 1211–1217.
- 715 49. Uche IV, MacLennan CA, Saul A. A Systematic Review of the Incidence, Risk Factors  
716 and Case Fatality Rates of Invasive Nontyphoidal *Salmonella* (iNTS) Disease in Africa  
717 (1966 to 2014). *PLoS Negl Trop Dis.* 2017;11: e0005118.
- 718 50. Ao TT, Feasey NA, Gordon MA, Heddy KH, Angulo FJ, Crump JA. Global Burden of  
719 Invasive Nontyphoidal *Salmonella* Disease, 2010<sup>1</sup>. *Emerging Infectious Disease*  
720 *journal.* 2015;21: 941.
- 721 51. Okoro CK, Barquist L, Connor TR, Harris SR, Clare S, Stevens MP, et al. Signatures of  
722 Adaptation in Human Invasive *Salmonella* Typhimurium ST313 Populations from Sub-  
723 Saharan Africa. *PLoS Negl Trop Dis.* 2015;9: e0003611.
- 724 52. Parsons BN, Humphrey S, Salisbury AM, Mikoleit J, Hinton JCD, Gordon MA, et al.  
725 Invasive non-typhoidal *Salmonella* typhimurium ST313 are not host-restricted and have  
726 an invasive phenotype in experimentally infected chickens. *PLoS Negl Trop Dis.*  
727 [journals.plos.org](http://journals.plos.org); 2013;7: e2487.
- 728 53. Ramachandran G, Panda A, Higginson EE, Ateh E, Lipsky MM, Sen S, et al. Virulence  
729 of invasive *Salmonella* Typhimurium ST313 in animal models of infection. *PLoS Negl*  
730 *Trop Dis.* 2017;11: e0005697.
- 731 54. Ramachandran G, Perkins DJ, Schmidlein PJ, Tulapurkar ME, Tennant SM. Invasive  
732 *Salmonella* Typhimurium ST313 with naturally attenuated flagellin elicits reduced  
733 inflammation and replicates within macrophages. *PLoS Negl Trop Dis.* 2015;9: e3394.
- 734 55. Carden S, Okoro C, Dougan G, Monack D. Non-typhoidal *Salmonella* Typhimurium  
735 ST313 isolates that cause bacteremia in humans stimulate less inflammasome  
736 activation than ST19 isolates associated with gastroenteritis. *Pathog Dis.* 2015;73.  
737 doi:10.1093/femspd/ftu023
- 738 56. Singletary LA, Karlinsey JE, Libby SJ, Mooney JP, Lokken KL, Tsolis RM, et al. Loss of  
739 Multicellular Behavior in Epidemic African Nontyphoidal *Salmonella enterica* Serovar  
740 Typhimurium ST313 Strain D23580. *MBio.* 2016;7. doi:10.1128/mBio.02265-15
- 741 57. Carden SE, Walker GT, Honeycutt J, Lugo K, Pham T, Jacobson A, et al.  
742 Pseudogenization of the Secreted Effector Gene *ssel* Confers Rapid Systemic  
743 Dissemination of *S. Typhimurium* ST313 within Migratory Dendritic Cells. *Cell Host*  
744 *Microbe.* 2017;21: 182–194.
- 745 58. Ashton PM, Owen SV, Kaindama L, Rowe WPM, Lane C, Larkin L, et al. *Salmonella*  
746 *enterica* Serovar Typhimurium ST313 Responsible For Gastroenteritis In The UK Are  
747 Genetically Distinct From Isolates Causing Bloodstream Infections In Africa [Internet].  
748 bioRxiv. 2017. p. 139576. doi:10.1101/139576
- 749 59. Almeida F, Seribelli AA, da Silva P, Medeiros MIC, Dos Prazeres Rodrigues D, Moreira  
750 CG, et al. Multilocus sequence typing of *Salmonella* Typhimurium reveals the presence  
751 of the highly invasive ST313 in Brazil. *Infect Genet Evol.* 2017;51: 41–44.

- 752 60. Painter JA, Mølbak K, Sonne-Hansen J, Barrett T, Wells JG, Tauxe RV. Salmonella-  
753 based rodenticides and public health. *Emerg Infect Dis.* 2004;10: 985–987.
- 754 61. Pasmans F, Van Immerseel F, Hermans K, Heyndrickx M, Collard J-M, Ducatelle R, et  
755 al. Assessment of virulence of pigeon isolates of *Salmonella enterica* subsp. *enterica*  
756 serovar typhimurium variant copenhagen for humans. *J Clin Microbiol.* 2004;42: 2000–  
757 2002.
- 758 62. Lawson B, Hughes LA, Peters T, de Pinna E, John SK, Macgregor SK, et al. Pulsed-  
759 field gel electrophoresis supports the presence of host-adapted *Salmonella enterica*  
760 subsp. *enterica* serovar Typhimurium strains in the British garden bird population. *Appl*  
761 *Environ Microbiol.* 2011;77: 8139–8144.
- 762 63. Mather AE, Lawson B, de Pinna E, Wigley P, Parkhill J, Thomson NR, et al. Genomic  
763 Analysis of *Salmonella enterica* Serovar Typhimurium from Wild Passerines in England  
764 and Wales. *Appl Environ Microbiol.* 2016;82: 6728–6735.
- 765 64. Barrick JE, Lenski RE. Genome dynamics during experimental evolution. *Nat Rev*  
766 *Genet.* 2013;14: 827–839.
- 767 65. Quick J, Loman NJ, Duraffour S, Simpson JT, Severi E, Cowley L, et al. Real-time,  
768 portable genome sequencing for Ebola surveillance. *Nature.* 2016;530: 228–232.
- 769 66. Aanensen DM, Feil EJ, Holden MTG, Dordel J, Yeats CA, Fedosejev A, et al. Whole-  
770 Genome Sequencing for Routine Pathogen Surveillance in Public Health: a Population  
771 Snapshot of Invasive *Staphylococcus aureus* in Europe. *MBio.* 2016;7.  
772 doi:10.1128/mBio.00444-16
- 773 67. Schürch AC, Schaik W. Challenges and opportunities for whole-genome sequencing--  
774 based surveillance of antibiotic resistance. *Ann N Y Acad Sci.* Wiley Online Library;  
775 2017;1388: 108–120.
- 776 68. Lippert C, Listgarten J, Liu Y, Kadie CM, Davidson RI, Heckerman D. FaST linear  
777 mixed models for genome-wide association studies. *Nat Methods.* 2011;8: 833–835.
- 778 69. Lees JA, Vehkala M, Välimäki N, Harris SR, Chewapreecha C, Croucher NJ, et al.  
779 Sequence element enrichment analysis to determine the genetic basis of bacterial  
780 phenotypes. *Nat Commun.* 2016;7: 12797.
- 781 70. Earle SG, Wu C-H, Charlesworth J, Stoesser N, Gordon NC, Walker TM, et al.  
782 Identifying lineage effects when controlling for population structure improves power in  
783 bacterial association studies. *Nat Microbiol.* 2016;1: 16041.
- 784 71. Chen PE, Shapiro BJ. The advent of genome-wide association studies for bacteria.  
785 *Curr Opin Microbiol.* 2015;25: 17–24.
- 786 72. Power RA, Parkhill J, de Oliveira T. Microbial genome-wide association studies:  
787 lessons from human GWAS. *Nat Rev Genet.* 2017;18: 41–50.
- 788 73. Lupolova N, Dallman TJ, Holden NJ, Gally DL. Patchy promiscuity: machine learning  
789 applied to predict the host specificity of *Salmonella enterica* and *Escherichia coli*.  
790 *Microbial Genomics.* Microbiology Society; 2017; doi:10.1099/mgen.0.000135
- 791 74. Roberts DR, Bahn V, Ciuti S, Boyce MS, Elith J, Guillera-Aroita G, et al. Cross-  
792 validation strategies for data with temporal, spatial, hierarchical, or phylogenetic

- 793 structure. *Ecography*. Blackwell Publishing Ltd; 2017;40: 913–929.
- 794 75. Stephan J, Stegle O, Beyer A. A random forest approach to capture genetic effects in  
795 the presence of population structure. *Nat Commun*. 2015;6: 7432.
- 796 76. Stamatakis A. RAxML version 8: a tool for phylogenetic analysis and post-analysis of  
797 large phylogenies. *Bioinformatics*. 2014;30: 1312–1313.
- 798 77. Page AJ, Cummins CA, Hunt M, Wong VK, Reuter S, Holden MTG, et al. Roary: rapid  
799 large-scale prokaryote pan genome analysis. *Bioinformatics*. 2015;31: 3691–3693.
- 800 78. Liaw A, Wiener M. Classification and regression by randomForest. *R news*. 2002;2: 18–  
801 22.
- 802 79. Breiman L, Friedman J, Stone CJ, Olshen RA. *Classification and Regression Trees*.  
803 Chapman and Hall/CRC; 1984.
- 804 80. Li H, Durbin R. Fast and accurate short read alignment with Burrows-Wheeler  
805 transform. *Bioinformatics*. 2009;25: 1754–1760.
- 806 81. McKenna A, Hanna M, Banks E, Sivachenko A, Cibulskis K, Kernytsky A, et al. The  
807 Genome Analysis Toolkit: a MapReduce framework for analyzing next-generation DNA  
808 sequencing data. *Genome Res*. 2010;20: 1297–1303.
- 809 82. Li H. A statistical framework for SNP calling, mutation discovery, association mapping  
810 and population genetical parameter estimation from sequencing data. *Bioinformatics*.  
811 2011;27: 2987–2993.
- 812 83. Croucher NJ, Page AJ, Connor TR, Delaney AJ, Keane JA, Bentley SD, et al. Rapid  
813 phylogenetic analysis of large samples of recombinant bacterial whole genome  
814 sequences using Gubbins. *Nucleic Acids Res*. 2015;43: e15.
- 815 84. Hadfield J, Croucher NJ, Goater RJ, Abudahab K, Aanensen DM, Harris SR.  
816 Phandango: an interactive viewer for bacterial population genomics. *Bioinformatics*.  
817 2017; doi:10.1093/bioinformatics/btx610
- 818
