1 Machine learning identifies signatures of host adaptation  
2 in the bacterial pathogen *Salmonella enterica*

3 Nicole E. Wheeler<sup>1,2,5</sup>, Paul P. Gardner<sup>2,3</sup>, Lars Barquist<sup>4,5</sup>

4 1. The Wellcome Trust Sanger Institute, Hinxton, United Kingdom.

5 2. Biomolecular Interaction Centre, School of Biological Sciences, University of Canterbury, Christchurch, New  
6 Zealand.

7 3. Department of Biochemistry, University of Otago, Dunedin, New Zealand.

8 4. Institute for Molecular Infection Biology, University of Wuerzburg, Wuerzburg, Germany.

9 5. Correspondence to: [nw17@sanger.ac.uk](mailto:nw17@sanger.ac.uk); [lars.barquist@uni-wuerzburg.de](mailto:lars.barquist@uni-wuerzburg.de)

10

11 Keywords: hidden Markov model, random forest, loss-of-function, niche adaptation.

## 12 **Abstract**

13 Emerging pathogens are a major threat to public health, however understanding how  
14 pathogens adapt to new niches remains a challenge. New methods are urgently required to  
15 provide functional insights into pathogens from the massive genomic data sets now being  
16 generated from routine pathogen surveillance for epidemiological purposes. Here we  
17 integrate a method for scoring the functional impact of mutations with a random forest  
18 classifier, and apply this to the classification of *Salmonella enterica* strains associated with  
19 extraintestinal disease. Members of the species fall along a continuum, from pathovars  
20 which cause gastrointestinal infection and low mortality, associated with a broad host-range,  
21 to those that cause invasive infection and high mortality, associated with a narrowed host  
22 range. By training our random forest classifier to discriminate gastrointestinal and invasive  
23 serovars of *Salmonella*, using a small and well-characterised training dataset, we are able to  
24 additionally discriminate recently emerged *Salmonella* Enteritidis and Typhimurium lineages  
25 associated with invasive disease in immunocompromised populations in sub-Saharan Africa.  
26 Importantly, our classifier produces interpretable lists of gene variants associated with  
27 extraintestinal disease. This approach accurately identifies patterns of gene degradation  
28 specific to invasive serovars that have been captured by more labour-intensive  
29 investigations, but can be readily scaled to larger analyses.

## 30 **Introduction**

31 Understanding how bacteria adapt to new niches and hosts and thus emerge or re-emerge  
32 as a cause of infectious disease in human and animals is of critical importance to  
33 anticipating and preventing epidemic disease (Frank and Schmid-Hempel 2008; Fauci and  
34 Morens 2012). With the decreasing cost of genome sequencing, comparative genomics has  
35 become a rich source of insight into the origins and movement of bacteria in new pathogenic  
36 niches. However, translating whole genome sequence databases into mechanistic and  
37 functional insights remains a challenge.

38

39 Early expectations were that pathogen evolution would be driven primarily by the acquisition  
40 of virulence factors. However, as whole-genome sequencing has become increasingly  
41 routine, a decidedly more complex picture has emerged (Pallen and Wren 2007; Loman and  
42 Pallen 2015). A pattern of bacterial entrance to a new niche followed by adaptation through  
43 the loss of antivirulence loci and reduced metabolic flexibility is now recognised as a  
44 paradigm of the emergence of important human pathogens from non-pathogenic bacterial  
45 species (McNally et al. 2016; The et al. 2016; Merhej et al. 2013; Reuter et al. 2014). These  
46 new niches can be the result of virulence factor acquisition providing access to a previously  
47 inaccessible niche in a so-called foothold moment (Reuter et al. 2014), or the emergence of  
48 new host niches driven by chronic disease (Marvig et al. 2015; Klemm et al. 2016; Feasey et  
49 al. 2012). While pathogen and host requirements for infection vary, there is increasing  
50 evidence of parallel evolution in bacteria adapting to the same or similar host niche. This is  
51 perhaps nowhere more evident than in the species *Salmonella enterica*.

52

53 *Salmonella enterica* strains that cause disease in warm-blooded mammals lie on a spectrum  
54 from those that have a broad host range and cause self-limiting gastrointestinal infection, to  
55 those that are more restricted in host range, but cause systemic disease and are typically  
56 associated with higher mortality (Rabsch et al. 2002; Feasey et al. 2012). Host-restricted,  
57 extraintestinal variants of *Salmonella enterica* have evolved independently multiple times  
58 from gastrointestinal ancestors (Bäumler and Fang 2013), and show a greater degree of  
59 gene degradation compared to their generalist relatives (Parkhill et al. 2001; McClelland et  
60 al. 2004; Thomson et al. 2008). There are common patterns in the genes that undergo  
61 pseudogenization in invasive *Salmonella*, most obviously an extensive network of genes  
62 required for anaerobic metabolism in the inflamed host gut (Nuccio and Bäumler 2014;  
63 Langridge et al. 2015), a pattern with parallels in other host-adapting enteropathogens  
64 (McNally et al. 2016).

65

66 Identifying these signals of parallel evolution has been challenging, relying mainly on manual  
67 annotation and comparison of pseudogenes (Nuccio and Bäumlér 2014; Langridge et al.  
68 2015). Detection of pseudogenes in particular relies on ad-hoc criteria to identify large  
69 truncations, deletions, or frameshifts (Lerat and Ochman 2005; Kuo and Ochman 2010). It is  
70 rare that the same genes or complete pathways are pseudogenized in host-adapted species;  
71 rather interpretation has relied on identifying overrepresentation of independent  
72 pseudogenization events clustered in certain pathways (Nuccio and Bäumlér 2014). If  
73 pseudogenization leads to pathway attenuation or inactivation, it seems likely that reduced  
74 selective pressure will lead to a higher incidence of detrimental mutation fixation in other  
75 genes in these pathways. Indeed, we have previously shown that functional variant calling,  
76 based on sequence deviation from patterns of conservation observed in deep sequence  
77 alignments, shows a similar functional signal in host-restricted *Salmonella enterica* serovar  
78 Gallinarum to pseudogene analysis (Wheeler et al. 2016), identifying a larger cohort of  
79 genes where constraints on drift appear to have been lifted during host-adaptation.  
80  
81 In previous work we developed DeltaBS, a profile hidden Markov model (HMM) based  
82 approach to functional variant calling (Wheeler et al. 2016). The basic assumption of this  
83 approach is that variation in conserved positions of a protein sequence is more likely to  
84 affect protein function than variation in less conserved regions. This approach can integrate  
85 information about nonsynonymous mutations, indels, and truncations. We have previously  
86 shown that DeltaBS can successfully identify functional changes in genes that would be  
87 missed by standard pseudogene analysis (Kingsley et al. 2013), and that a subset of genes  
88 in host-adapted strains appear to accumulate large DeltaBS values (Wheeler et al. 2016).  
89 Additionally, others have observed similar changes in DeltaBS distributions during  
90 adaptation of *Salmonella* to a single immunocompromised host (Klemm et al. 2016). We  
91 generally assume that a large DeltaBS value is indicative of a decay in protein function. We  
92 cannot rule out that a large DeltaBS may rather indicate a change in protein function, though  
93 we expect this to be relatively rare.

94

95 Here, we have leveraged these previous observations to identify signatures of mutational  
96 burden consistent with adaptation to an invasive lifestyle. We have developed a random  
97 forest classifier using delta bitscore (DeltaBS) functional variant calling (Wheeler et al. 2016)  
98 that can perfectly separate intestinal *Salmonella* serovars from host-adapted, extraintestinal  
99 serovars. We use random forest models because they perform well on datasets with few  
100 informative variables (Dutilh et al. 2013; Pappu and Pardalos 2014), and have the potential  
101 to detect functional relationships (i.e. epistasis) between genes with a decision tree structure  
102 (Touw et al. 2013; Wei et al. 2014). They have been applied successfully in the past to  
103 predict microbial phenotype using gene presence/absence data (Bayjanov et al. 2012), and  
104 SNPs already known to be associated with phenotype (Laabei et al. 2014; Alam et al. 2014).  
105 We show that these models produce interpretable signatures of host-adaptation, and  
106 furthermore that these signatures can be detected in strains of *Salmonella* associated with  
107 invasive disease in immunocompromised populations in sub-Saharan Africa.

## 108 **Results**

### 109 ***Constructing a random forest classifier for extraintestinal Salmonellae***

110 The approach taken in this investigation is summarised in Fig 1, and described below. We  
111 built our model using a collection of genomes from well-characterised reference strains of  
112 gastrointestinal and extraintestinal *Salmonella* serovars (Supplemental Table S1), drawing  
113 on the extensive curation of orthology relationships performed by Nuccio and Bäumler  
114 (2014). These strains were originally characterised as “gastrointestinal” or “extraintestinal”  
115 based on common patterns of gene degradation, host restriction and clinical characteristics  
116 observed among the extraintestinal strains (Nuccio and Bäumler 2014), and we have  
117 employed this same categorisation our analysis. We scored the functional importance of  
118 sequence variation by comparing the protein coding genes of each serovar to profile HMMs  
119 from the eggNOG database (Huerta-Cepas et al. 2016), designed to capture patterns of

120 sequence variation typically seen in the protein coding genes of Gammaproteobacteria (see  
121 Methods).

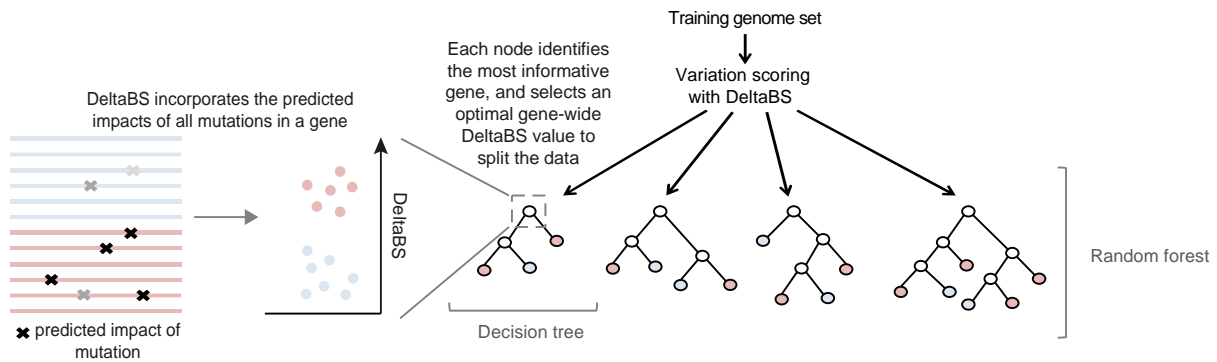

122

### 123 **Fig 1 | Overview of the approach employed in this study**

124 For each genome, the functional significance of sequence variation within protein coding  
125 genes is quantified using the DeltaBS metric. Following scoring, a bootstrap sampling of  
126 genomes are used to train each decision tree. For each node in the tree, a random subset of  
127 genes are sampled, and the most informative gene from this set is chosen to split the data.  
128 For each node in the tree, the predictive utility of the selected gene (variable importance) is  
129 tested by calculating how well the gene separates the samples according to phenotype.

130

131 We then employed random forests to identify the genes which were most informative of  
132 phenotype when viewed collectively. Random forests work by building an ensemble of  
133 decision trees designed to predict a characteristic of the samples (Breiman 2001), in this  
134 case adaptation to an extraintestinal, or invasive, niche. For each node in the decision tree,  
135 the best gene of a random sampling from the training gene set is selected according to its  
136 ability to separate a randomly selected subset of samples by phenotype based on DeltaBS  
137 values. The process of building a random forest produces measures of variable importance  
138 that can be used to assess the relative utility of different genes in classification of *Salmonella*  
139 strains based on lifestyle.

140 ***A small subset of genes are strongly predictive of invasiveness in Salmonella***

141 To obtain an indication of the proportion of the genome that shows patterns of unusual  
142 sequence variation associated with an invasive phenotype, we trained a random forest  
143 model on a set of 6,438 orthologous genes. Accuracy of the model was assessed using out-  
144 of-bag accuracy. This out-of-bag (OOB) measure of accuracy gives us an indication of how  
145 well each decision tree in the forest performs at predicting phenotype in a serovar it has  
146 never encountered before, using information on DeltaBS differences collected from other  
147 serovars. Next, we performed iterative feature selection to improve the performance of the  
148 model. This process involved repeated rounds of selecting the top 50% of predictors and re-  
149 training the model, until the model achieved perfect OOB predictive performance on the  
150 training dataset (Fig 2A). When the full set of filtered orthologous genes was used to build a  
151 model, a subset of genes ranked much higher than the others in variable importance (VI)  
152 (Fig 2B). We then saw a tailing off of VI, resulting in 4,721 orthologous groups either not  
153 being used in the model, or not improving classification accuracy (as indicated by  $VI \leq 0$ ).  
154 The final model used 196 of the original 6,438 genes for prediction (Supplemental Table S2).  
155 This model additionally achieved perfect classification accuracy on an independent set of  
156 genomes of the same serovars as our training data (Supplemental Fig S1).

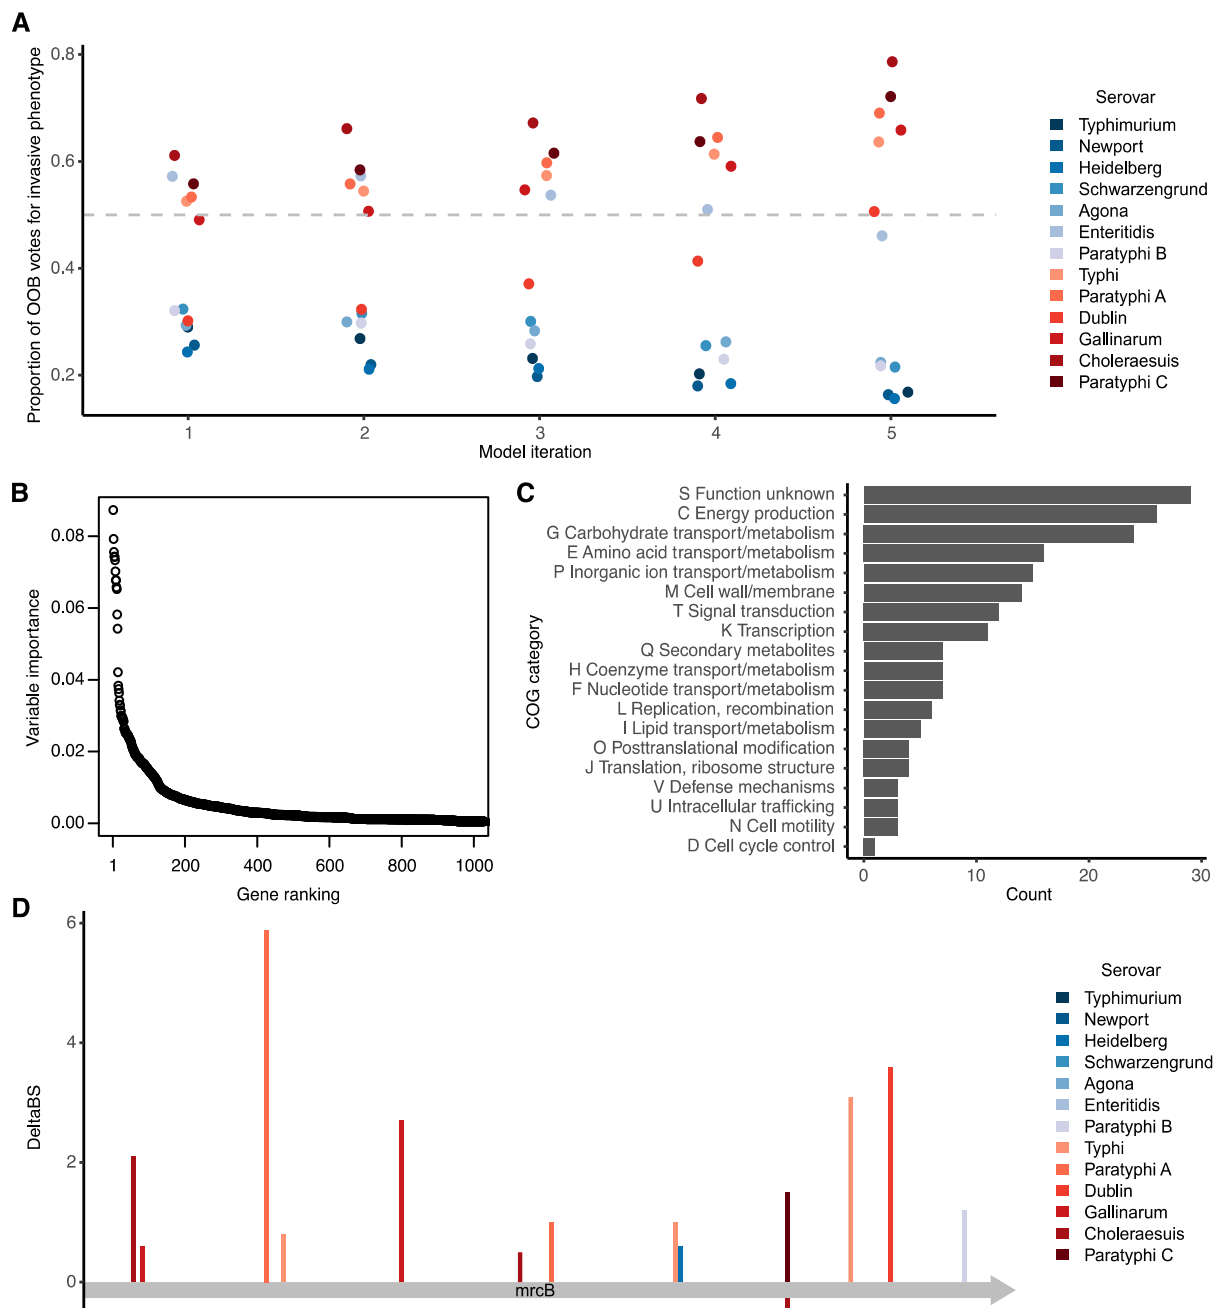

157

158 **Fig 2 | A subset of *Salmonella* genes are strongly indicative of invasive potential**

159 A: Out-of-bag votes for phenotype of each serovar cast by each model. Model 1 is the model

160 built using all predictor variables, then each successive model was built using sparsity

161 pruning from the previous model's predictor variables. Model 5 is the final model with 100%

162 accuracy. Out-of-bag votes include only those votes cast by trees that were not trained on a

163 given sample. The dashed grey line indicates the voting threshold to classify an isolate as

164 invasive. Invasive serovars are coloured in red and gastrointestinal serovars are coloured in

165 blue.



166 B: Of all genes used in the original training dataset, a small minority are given high  
167 importance in identifying invasive strains. Variable importance is shown for the top 1000  
168 genes used in the original training set. Variable importance was measured as average  
169 decrease in Gini index in a random forest model trained on all orthologous groups that met  
170 the inclusion criteria (N = 6,438).

171 C: Functional categories associated with the top predictive genes.

172 D: Mutations in *mrcB* (penicillin-binding protein 1b), one of the top three predictors.  
173 Mutations in different strains are colour-coded, with bars in red indicating a mutation in an  
174 extraintestinal strain and bars in blue indicating a mutation in a gastrointestinal strain. An  
175 estimate of the effect of the mutation on protein function (DeltaBS) is shown on the y-axis,  
176 with positive values indicating higher chance of a mutation being deleterious to protein  
177 function. The x-axis represents the length of the protein.

### 178 ***Predictive genes are typically degraded or absent in invasive isolates***

179 We anticipated that the majority of informative genes identified in our study would be genes  
180 that showed functional degradation in invasive isolates but not in gastrointestinal isolates. Of  
181 the top predictors in our study (N = 196), 154 showed significantly greater mutational burden  
182 in extraintestinal strains compared to gastrointestinal strains (Mann-Whitney U test, adjusted  
183 *P*-value < 0.05), compared to 9 genes that showed significantly greater mutational burden in  
184 gastrointestinal strains. Of the genes that were more conserved in invasive isolates, one was  
185 the aldo-keto reductase *yakC*, which was deleted or truncated in all but one gastrointestinal  
186 strain and intact in all invasive strains. Another was the chaperone protein *yajL*, which  
187 appears to be important for oxidative stress tolerance (Kthiri et al. 2010; Le et al. 2012).

188

189 Among the top predictors were several sets of genes belonging to the same operon (S2  
190 Table). Examples included the *ttr*, *cbi* and *pdu* operons, which are all required for the  
191 anaerobic metabolism of 1,2-propanediol (Roth et al. 1996). These operons have previously  
192 been identified as key degraded pathways in invasive isolates (Thomson et al. 2008; Nuccio

193 and Bäumlér 2014; Langridge et al. 2015), and indicate the agreement of this method with  
194 other studies linking loss of gene function to host niche. Overall, a large proportion of the  
195 identified genes were involved in metabolism (Fig 2C), consistent with the findings of similar  
196 studies (Nuccio and Bäumlér 2014; Langridge et al. 2015). Other major categories affected  
197 include proteins involved in cell wall and membrane function, perhaps suggesting changes  
198 affecting recognition by the host immune system, and signal transduction, suggesting some  
199 degree of consistent regulatory rewiring during adaptation to an extraintestinal niche.

200 ***Sequence changes in key indicator genes involve independent mutations in each***  
201 ***serovar, contributing to similar functional outcomes***

202 When examining individual genes that showed differences in mutational burden between  
203 invasive and gastrointestinal isolates, we found that most of these mutations had occurred  
204 independently, and had occurred at different sites in the protein. While the majority of genes  
205 identified appeared to be cases of gene degradation in invasive lineages, some genes  
206 showed more subtle signs of mutational burden, restricted to nonsynonymous changes of  
207 modest predicted functional impact. An example of this, Fig 2D, illustrates mutation  
208 accumulation in one of the top candidate genes, *mrcB*, encoding penicillin-binding protein 1b  
209 (PBP1b). Not only does *mrcB* carry more mutations in invasive serovars compared to  
210 gastrointestinal serovars, the mutations have occurred independently in different positions  
211 within the protein. Penicillin-binding proteins are the major target of  $\beta$ -lactam antibiotics and  
212 are important for synthesis and maturation of peptidoglycan (Typas et al. 2011). PBP1b in  
213 particular extends and crosslinks peptidoglycan chains during cell division. While PBP1b is  
214 not essential, it has been shown to be synthetically lethal with PBP1a and is important for  
215 competitive survival of extended stationary phase, osmotic stress (Pepper et al. 2006), and  
216 — in *Salmonella* Typhi — growth in the presence of bile (Langridge et al. 2009). Bile is an  
217 important environmental challenge for *Salmonella*, particularly for extraintestinal serovars  
218 which colonize the gall bladder (Crawford et al. 2010). While there are more mutations in  
219 invasive than in gastrointestinal serovars, the mutations that occur in this protein are all

220 amino acid substitutions of modest predicted impact. This suggests that sequence changes  
221 could result in a modification of protein function, rather than a loss, consistent with the  
222 importance of PBP1b for the survival of *S. Typhi* during a typical infection cycle (Langridge et  
223 al. 2009).

#### 224 ***S. Dublin and S. Enteritidis serovars are more difficult to classify than others***

225 To anticipate the performance of our random forest model on new data we computed out-of-  
226 bag (OOB) error. Because random forests train each decision tree on a random subset of  
227 the training data, OOB error can be computed by testing the performance of these trees on  
228 data they have not been trained on, providing inbuilt cross-validation (Breiman 2001). In our  
229 case, perfect OOB classifications were only achieved by the fifth iteration of the model. The  
230 need for iterative improvement of the model came from difficulty in correctly classifying the  
231 reference strains for serovars Enteritidis and Dublin. This is reflective of their relatively  
232 recent divergence and niche adaptation compared to other serovars in the study. *S.*  
233 *Gallinarum* was classified much more readily than *S. Enteritidis* and *S. Dublin*, despite  
234 being closely related to both serovars, perhaps due to its host restriction.

235

236 *S. Enteritidis* was initially mis-classified as invasive, indicating that it shares genomic trends  
237 with invasive lineages. Genomic analyses have indicated that the ancestor of *S. Enteritidis*  
238 previously possessed intact pathogenicity islands (SPI-6 and SPI-19), each encoding a type  
239 six secretion system (Langridge et al. 2015; Blondel et al. 2009). These loci have been  
240 implicated in host-adaptation and survival during extraintestinal infection (Blondel et al. 2013;  
241 Mulder et al. 2012), and it has been speculated based on their loss and other evidence that  
242 classical *S. Enteritidis* has been adapting towards greater host generalism with respect to its  
243 ancestral state (Langridge et al. 2015). This could explain the greater number of disrupted  
244 and deleted genes relative to other gastrointestinal serovars used in this study, and the  
245 difficulty in classifying it correctly. Conversely, *S. Dublin* was initially mis-classified as  
246 gastrointestinal. In previous studies *S. Dublin* has been shown to possess fewer

247 pseudogenes than related invasive isolates (Nuccio and Bäuml er 2014; Langridge et al.  
248 2015), suggesting a lower degree of host adaptation than other invasive isolates. Indeed, S.  
249 Dublin is more promiscuous in its host range, primarily infecting cattle (Kingsley and Bäuml er  
250 2000) while still causing sporadic human disease (Harvey et al. 2017). It seems likely that a  
251 subset of informative genes identified in early iterations of the model may have been  
252 indicators of host restriction or generalism rather than broad extraintestinal adaptation.

253 ***Patterns of gene degradation identified in established invasive lineages are present in***  
254 ***novel lineages of S. Typhimurium and S. Enteritidis associated with systemic***  
255 ***infection***

256 In recent years there have been reports of novel S. Typhimurium and S. Enteritidis lineages  
257 associated with invasive disease in sub-Saharan Africa (Kingsley et al. 2009; Okoro et al.  
258 2012; Feasey et al. 2016) in populations with a high prevalence of immunosuppressive  
259 illness such as HIV, malaria, and malnutrition (Uche et al. 2017). These lineages contribute  
260 to a staggering burden of invasive non-typhoidal salmonella (iNTS) disease, which is  
261 responsible for an estimated 3.4 million cases and circa 680,000 deaths annually (Ao et al.  
262 2015). Based on epidemiological analysis, high-throughput metabolic screening of selected  
263 strains, and analysis of pseudogenes it has been suggested that these lineages may be  
264 rapidly adapting to cause invasive disease in the human niche created by widespread  
265 immunosuppressive illness (Kingsley et al. 2009; Feasey et al. 2012; Okoro et al. 2012,  
266 2015; Feasey et al. 2016).

267

268 Two iNTS-associated lineages have recently been described within serovar Enteritidis  
269 (Feasey et al. 2016), geographically restricted to West Africa and Central/East Africa,  
270 respectively. Initial observations have demonstrated that a representative isolate of the  
271 Central/East African clade has a reduced capacity to respire in the presence of metabolites  
272 requiring cobalamin for their metabolism and has lost the ability to colonize a chick infection  
273 model (Feasey et al. 2016), suggesting adaptation to a new host niche. Similarly, two iNTS

274 disease associated lineages have been described in serovar Typhimurium (Okoro et al.  
275 2012), both members of sequence type 313 (ST313), generally referred to as Lineage I and  
276 II in the literature. Lineage II appears to have largely replaced Lineage I since 2004, and it  
277 has been suggested this is due to Lineage II possessing a gene encoding chloramphenicol  
278 resistance (Okoro et al. 2012). Laboratory characterization of Lineage II strains has shown  
279 that they are not host-restricted (Parsons et al. 2013; Ramachandran et al. 2017), but do  
280 appear to possess characteristics suggestive of adaptation to an invasive lifestyle  
281 (Ramachandran et al. 2015; Carden et al. 2015; Singletary et al. 2016; Carden et al. 2017).

282

283 Given the evidence of adaptation to an invasive niche in these lineages, we asked if  
284 genomics signatures of extraintestinal adaptation we had detected previously could be  
285 detected in iNTS disease associated lineages. To this end, we applied our predictive model  
286 trained on well-characterized extraintestinal strains to calculate an invasiveness index, the  
287 fraction of decision trees in the random forest voting for an invasive phenotype. First, we  
288 compared isolates from African iNTS-associated clades of *S. Enteritidis* (N=233) to a global  
289 collection of isolates generally associated with intestinal infection (N=100) (Feasey et al.  
290 2016).

291

292 Our model gave iNTS-associated *S. Enteritidis* strains a higher invasiveness index than the  
293 globally distributed isolates (Fig 3A,B, Supplemental Table S3), indicating the presence of  
294 genetic changes paralleling those that have occurred in extraintestinal serovars of  
295 *Salmonella*. Similar gene signatures were only rarely observed in the global epidemic clade  
296 (Fig 3C). These findings are consistent with the metabolic changes observed by Feasey et  
297 al. (2016) in the Central/Eastern African clade compared to the global epidemic clade. In  
298 particular we found signs of gene sequence variation uncharacteristic of gastrointestinal  
299 *Salmonella* across a number of key genomic indicators, including *tcuR*, *ttrA*, *pocR*, *pduW*,  
300 *eutH*, SEN2509 (a putative anaerobic dimethylsulfoxide reductase) and SEN3188 (a putative  
301 tartrate dehydratase subunit), all in pathways previously identified by Nuccio and Bäuml

302 (2014) as being involved in the utilization of host-derived nutrients in the inflamed gut  
303 environment. This indicates that our model is able to identify early signatures of adaptation,  
304 even in these recently emerged strains that still retain some capacity to cause enterocolitis  
305 (Feasey et al. 2016).

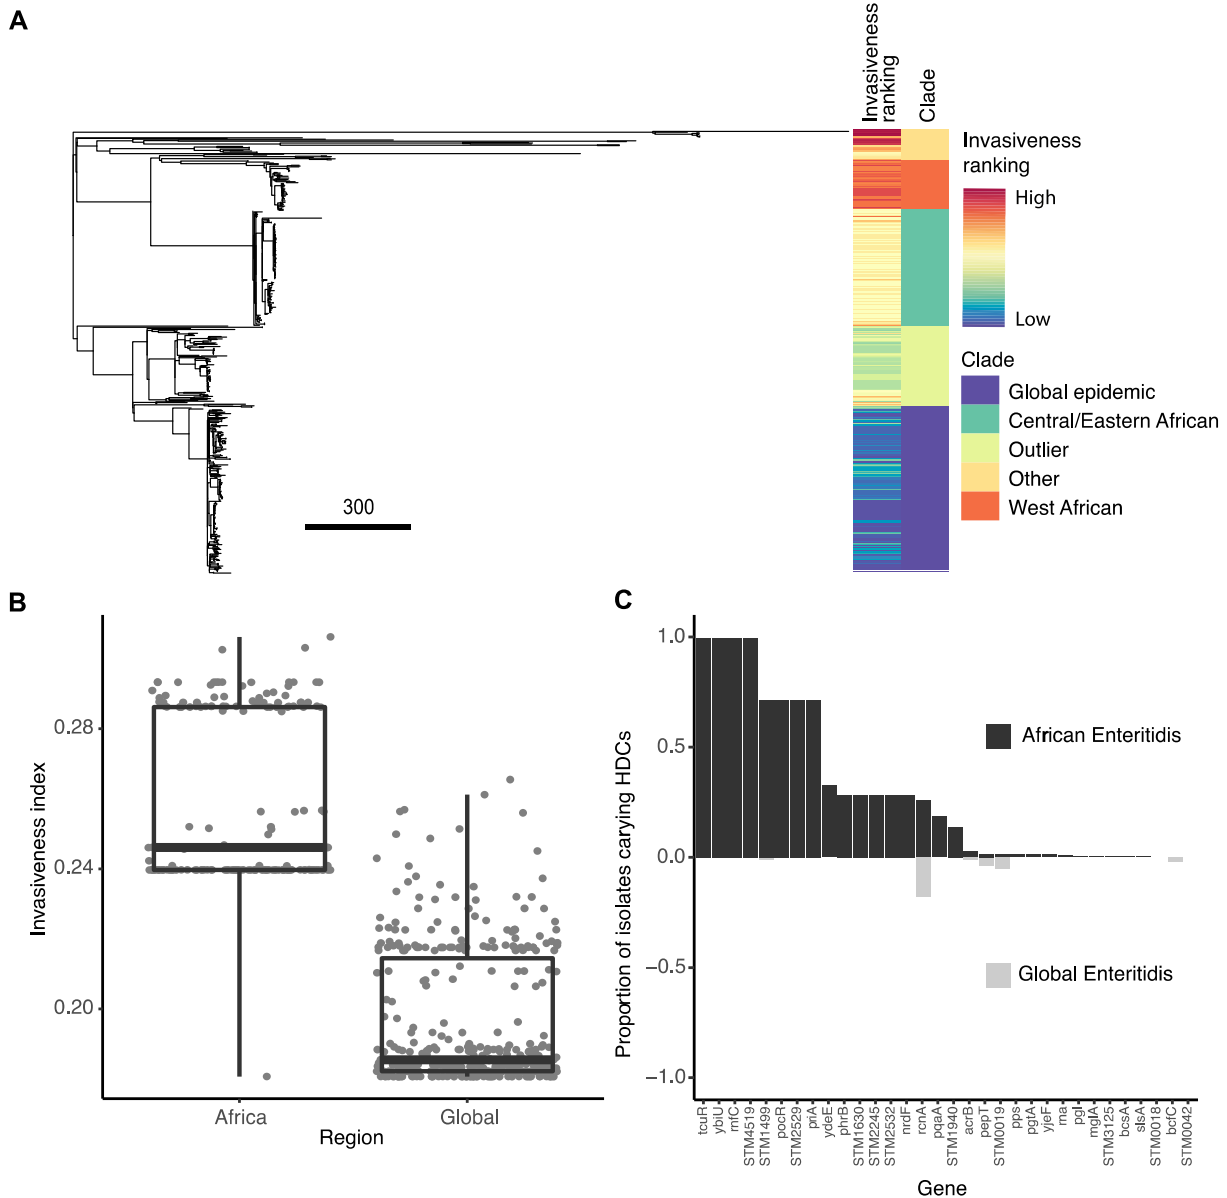

306

307 **Fig 3 | Voting of the model on African iNTS and global gastrointestinal isolates**

308 A: Maximum likelihood phylogeny of all *S. Enteritidis* isolates included in the study,  
309 annotated with invasiveness ranking and clade.

310 B: Invasiveness indices for African and non-African clades of *Salmonella*. Lower and upper  
311 boundaries of the boxplots correspond to the 25th and 75th quantiles.

312 C: The proportion of isolates from each tested dataset carrying a hypothetically disrupted  
313 coding sequence (HDC, as defined by a  $\Delta\text{DeltaBS} > 3$  relative to the reference serovar). Genes  
314 are ordered by the amount of degradation observed in African clades. African strains are  
315 shown in the positive y-axis in darker grey, global strains are shown in the negative y-axis in  
316 lighter grey.

317

318 To confirm this, we performed an additional comparison of *S. Typhimurium* ST313 isolates  
319 (N=208), to global isolates from other STs, predominantly ST19, associated with  
320 gastroenteritis (N=51) (Okoro et al. 2015; Ashton et al. 2017). Similarly to iNTS associated  
321 *S. Enteritidis* isolates, *S. Typhimurium* ST313 isolates has a higher invasiveness index than  
322 isolates from other STs (Supplemental Fig S2, Supplemental Table S4). Within ST313,  
323 Lineage II scored higher than Lineage I, possibly suggesting differential adaptation to the  
324 extraintestinal niche. We found that there were in fact more degraded genes unique to  
325 Lineage I than Lineage II, but that these genes were assigned less weight in the model, so  
326 did not impact score as strongly (Supplemental Fig S2 & S3). Interestingly, ST313 has  
327 recently been shown not to be entirely restricted to Africa, with isolation reported in Brazil  
328 (Almeida et al. 2017) and the UK (Ashton et al. 2017). We included a collection of UK ST313  
329 strains (Ashton et al. 2017) in our analysis, and found that their invasiveness index tended to  
330 be elevated compared to non-ST313 salmonellae, and intermediate between Lineage I and  
331 II, suggesting that some of the changes we are detecting are ancestral to ST313 as a whole  
332 (Supplemental Fig S3).

333

334 To test whether we could detect a recent case of accelerated adaptation over the course of a  
335 single infection, we scored the invasiveness index of a collection of hypermutator *S.*  
336 *Enteritidis* isolates collected over a ten year period that were adapting to chronic systemic  
337 infection of an immunocompromised patient (Klemm et al. 2016). We found a significant  
338 positive correlation between invasiveness index and duration of carriage ( $r=0.96$ ,  $n=6$ ,  
339  $P=0.002$ , Supplemental Fig S4).

## 340 Discussion

341 Parallel evolution appears to be common in niche adaptation, which allows us to identify  
342 genes that are important for survival in different environments. Parallelism has been  
343 observed across vastly different time scales in adapting pathogens. Parallel evolution in the  
344 distantly related genera *Salmonella* and *Yersinia* during adaptation to invasive infection of  
345 the human host has led to independent losses of the *ttr*, *cbi* and *pdu* genes, important for  
346 anaerobic metabolism during intestinal infection (McNally et al. 2016). Within genera,  
347 parallelism has been observed when distinct lineages acquire similar virulence factors  
348 leading to similar phenotypes, as with *Yersinia pseudotuberculosis* and *enterocolitica*  
349 (Reuter et al. 2014), or the repeated emergence of the *Shigella* phenotype within the  
350 *Escherichia* (The et al. 2016). Even on the scale of a single human lifetime, parallel  
351 adaptation has been observed in *Pseudomonas aeruginosa* lineages adapting to infection of  
352 the lungs of children with cystic fibrosis (Marvig et al. 2015), or a hypermutator strain of  
353 *Salmonella* adapting to an immunocompromised host (Klemm et al. 2016). With pathogen  
354 sequencing for disease surveillance becoming increasingly routine (Quick et al. 2016;  
355 Aanensen et al. 2016; Schürch and Schaik 2017), we have the opportunity to search for  
356 signals of parallel evolution as new pathogens emerge, or old pathogens expand into new  
357 niches.

358

359 Here, we have developed an approach for automatically learning which genes contribute to  
360 this parallel adaptation. Leveraging the DeltaBS functional variant scoring approach we  
361 developed previously (Wheeler et al. 2016) allowed us to construct scores which integrate  
362 independent mutations and indels that impact gene function. Using these scores, we were  
363 able to construct a classifier model which is able to separate *Salmonella* serovars adapted to  
364 an extraintestinal niche from gastrointestinal strains. Importantly, the random forest classifier  
365 that we used produces interpretable lists of genes involved in this adaptation, which agree  
366 with results in the literature attained through manual curation of pseudogenes. Additionally,



367 we have shown that this classifier is able to identify nascent signatures of adaptation in  
368 strains of *Salmonella* which have been evolving in response to large populations of  
369 immunocompromised patients in resource-poor nations.

370

371 Other automated approaches to detecting adaptation have been developed which search for  
372 SNPs (Lippert et al. 2011) or words (Lees et al. 2016; Earle et al. 2016) associated with  
373 phenotype. These approaches, termed microbial genome-wide association studies  
374 (GWASs), have used techniques adapted from human GWASs, but better cater to  
375 methodological issues that arise due to the differences between human and bacterial  
376 inheritance patterns. Major differences impacting analyses are stronger linkage  
377 disequilibrium (LD) between genetic variants in bacterial genomes, greater population  
378 stratification, and often stronger selection for traits (Chen and Shapiro 2015). Greater LD  
379 and population stratification often result in traits being linked closely with particular lineages,  
380 and a large number of variants unique to a lineage being spuriously associated with  
381 phenotype. Correction for population stratification allows greater discrimination of true and  
382 false positive associations, but results in a substantial loss of power to detect true positives  
383 (Chen and Shapiro 2015), particularly in phenotypes that are highly polygenic and are not  
384 under strong positive selection (Power et al. 2017). This can be corrected by increasing the  
385 sample size of the study, but increasing sample size can make measurement of complex  
386 phenotypes infeasible (Dutilh et al. 2013).

387

388 DeltaBS differs from current approaches by allowing the estimation of the combined effects  
389 of variants, both common and rare, on gene function. The weighting scheme can also  
390 combine data on gene presence/absence, indels and SNPs into a single metric. It  
391 significantly reduces the number of association tests that need to be performed to  
392 comprehensively capture much of the genetic diversity in a species, increasing power to  
393 detect associations, and reducing the requirement for such large sample sizes. The  
394 approach also aids in identifying genetic variants that are most likely to have a phenotypic

395 effect within LD blocks. The DeltaBS variant scoring approach can be readily applied to large  
396 datasets, and could be employed in a linear mixed model (LMM) based association testing  
397 framework (Lippert et al. 2011), or used in a hybrid LMM-random forest based approach  
398 (Stephan et al. 2015) to preserve the ability of the metric to detect epistasis between genes  
399 (Wei et al. 2014).

## 400 **Methods**

### 401 ***Genome data and identification of orthologs***

402 Genomes for 13 *Salmonella enterica* serovars were retrieved from the NCBI database  
403 (accessions and serovar information can be found in S1 Table). The serovars were divided  
404 into gastrointestinal and extraintestinal serovars according to the classifications made by  
405 Nuccio and Bäumler (2014). Ortholog calls were also taken from the Supplementary Material  
406 of Nuccio and Bäumler (2014).

### 407 ***Measuring the divergence of genes from predicted sequence constraints***

408 Profile hidden Markov models (HMMs) for Gammaproteobacterial proteins were retrieved  
409 from the eggNOG database (Huerta-Cepas et al. 2016). We chose this source of HMMs  
410 because it is publically available, allowing for better reproduction of analyses, and we feel it  
411 provides a good balance between collecting enough sequence diversity to capture typical  
412 patterns of sequence variation in a protein, without sacrificing sensitivity in the detection of  
413 deleterious mutations, as we have observed with Pfam HMMs (Wheeler et al. 2016). Each  
414 protein sequence was searched against the HMM database using hmmsearch from the  
415 HMMER3.0 package (<http://hmmer.org>). The top scoring model corresponding to each  
416 protein was used for analysis (N = 8,060 groups). Orthologous groups (OGs) with no  
417 corresponding eggNOG HMM, or more than one top model hit were excluded from further  
418 analysis (N = 1,524). If most genes in an OG had a significant hit (E-value<0.0001) to the  
419 same eggNOG model, any genes within this OG that did not were assigned a score of zero,

420 reflecting a loss of the function of that protein. These cases typically reflected a truncation  
421 that had occurred early in the protein sequence. Additionally, genes with no variation in  
422 bitscore for the match between protein sequences and their respective eggNOG HMM  
423 across isolates were excluded (N = 188). After this filtering process, 6,439 orthologous  
424 groups remained for analysis. Residue-specific DeltaBS (as in Fig 2D) was calculated by  
425 aligning orthologous sequences, choosing a reference sequence (from *S. Typhimurium*), and  
426 substituting each variant match state and any accompanying insertions into the reference  
427 sequence and calculating the difference in bitscore caused by the substitution.

### 428 ***Training a random forest classifier***

429 The R package “randomForest” (Liaw and Wiener 2002) was used to build random forest  
430 classifiers using a variety of parameters to assess which were best for accuracy. Prediction  
431 accuracy, as measured by out-of-bag (OOB) error rate, stabilised at 1000 trees, so we chose  
432 this as a parameter for optimising the number of genes sampled per node (mtry). mtry  
433 values of 1,  $p/10$ ,  $p/5$ ,  $p/3$ ,  $p/2$  and  $p$  (where  $p$  = the number of predictors) were tested, and  
434 we found that at  $mtry=p/10$ , the number of genes that were either not incorporated into trees,  
435 or did not improve the homogeneity of daughter nodes when they were incorporated into  
436 trees (as measured by mean decrease in Gini index, (Breiman et al. 1984)) stabilised at  
437 ~92%.

438

439 To improve the performance of the model, we performed five model building and sparsity  
440 pruning cycles. For the first cycle, we built a random forest model using all genes that met  
441 the inclusion criteria, and performed sparsity pruning by eliminating all variables that had a  
442 mean Gini index (variable importance) of zero or lower (meaning the gene was either not  
443 included in the model or did not improve model accuracy when it was). Four successive  
444 rounds of model building and sparsity pruning involved building a new model with the pruned  
445 dataset, then pruning the genes with the lowest 50% of variable importances. The resulting  
446 model had 100% out-of-bag classification accuracy. We also tested the accuracy of the full

447 model on a collection of alternative strains related to the training dataset (see Table S1).  
448 Orthologs to the top genes identified by our model were identified using phmmer from the  
449 HMMER3.0 package (<http://hmmer.org>).

#### 450 ***Invasive non-typhoidal Salmonella analysis***

451 Read data from Feasey et al. (2016) and Klemm et al. (2016) was mapped to the reference  
452 genome *S. Enteritidis* P125109. Reads from Okoro et al. (2015) and Ashton et al. (2017)  
453 were mapped to the reference genome *S. Typhimurium* LT2. For samples in the Okoro  
454 study, if an isolate was sequenced using multiple runs, the most recent run was chosen for  
455 analysis. All reads were mapped using BWA mem (Li and Durbin 2009) and regions near  
456 indels were realigned using GATK (McKenna et al. 2010). Picard  
457 (<http://broadinstitute.github.io/picard>) was used to identify and flag optical duplicates  
458 generated during library preparation. SNPs and indels were called using samtools v1.2  
459 mpileup (Li 2011), and were filtered to exclude those variants with coverage <10 or quality  
460 <30. For tree building, a pseudogenome was constructed by substituting high confidence  
461 (coverage >4, quality >50) variant sites in the reference genome, and masking any sites with  
462 low confidence with an “N”. Insertions relative to the reference genome were ignored, and  
463 deletions were filled with an “N”. Pseudogenome alignments were then used as input to  
464 produce trees using Gubbins (Croucher et al. 2015) to exclude recombination events, and  
465 RAxML v8.2.8 (Stamatakis 2014) to build maximum likelihood trees using a GTR + Gamma  
466 model.

467

468 Sequences for the 196 genes of interest used in the random forest model were retrieved for  
469 each isolate and translated. These were then scored using their respective profile HMMs.  
470 Score data was collated, and any missing values were marked as ‘NA’ and imputed using  
471 the `na.roughfix` function from the `randomForest` R package (Liaw and Wiener 2002). This is  
472 a different approach used to that of the training dataset, due to the potentially lower quality of  
473 the sequenced genomes leading to gene absence due to low coverage rather than true

474 deletion or severe truncation. The relationship between invasiveness ranking and phylogeny  
475 were visualised using Phandango (Hadfield et al. 2017).

#### 476 **Data access**

477 All genome sequence data are publically available, and accessions are provided in the  
478 appropriate Supplemental Tables. Code and data for reproducing this analysis, performing  
479 an equivalent analysis using new data, and assessing the invasiveness index of other  
480 *Salmonella* strains is publically available at [github.com/UCanCompBio/invasive\\_salmonella](https://github.com/UCanCompBio/invasive_salmonella).

#### 481 **Funding information**

482 NEW was supported by a PhD scholarship from the University of Canterbury, a Biomolecular  
483 Interaction Centre Postdoctoral Fellowship, and the Wellcome Trust grant 206194. LB was  
484 supported in part by a Research Fellowship from the Alexander von Humboldt  
485 Stiftung/Foundation. NEW and PPG are supported by a Rutherford Discovery Fellowship  
486 administered by the Royal Society of New Zealand, the Bioprotection Research Centre and  
487 the National Science Challenge “NZ’s Biological Heritage”.

#### 488 **Acknowledgements**

489 We are grateful to Sean Eddy for useful discussions and providing fast, accurate and free  
490 software, and to Simon Harris for developing the pipeline used for mapping reads and calling  
491 SNPs for the iNTS portion of our analysis. We also thank Nick Feasey, Nick Thomson and  
492 John Crump for their helpful feedback.

#### 493 **References**

494 Aanensen DM, Feil EJ, Holden MTG, Dordel J, Yeats CA, Fedosejev A, Goater R, Castillo-Ramírez S,  
495 Corander J, Colijn C, et al. 2016. Whole-Genome Sequencing for Routine Pathogen  
496 Surveillance in Public Health: a Population Snapshot of Invasive *Staphylococcus aureus* in  
497 Europe. *MBio* 7. doi: 10.1128/mBio.00444-16.

- 498 Alam MT, Petit RA 3rd, Crispell EK, Thornton TA, Conneely KN, Jiang Y, Satola SW, Read TD. 2014.  
499 Dissecting vancomycin-intermediate resistance in staphylococcus aureus using genome-wide  
500 association. *Genome Biol Evol* **6**: 1174–1185.
- 501 Almeida F, Seribelli AA, da Silva P, Medeiros MIC, Dos Prazeres Rodrigues D, Moreira CG, Allard  
502 MW, Falcão JP. 2017. Multilocus sequence typing of Salmonella Typhimurium reveals the  
503 presence of the highly invasive ST313 in Brazil. *Infect Genet Evol* **51**: 41–44.
- 504 Ao TT, Feasey NA, Gordon MA, Heddy KH, Angulo FJ, Crump JA. 2015. Global Burden of Invasive  
505 Nontyphoidal Salmonella Disease, 2010<sup>1</sup>. *Emerging Infectious Disease journal* **21**: 941.
- 506 Ashton PM, Owen SV, Kaindama L, Rowe WPM, Lane C, Larkin L, Nair S, Jenkins C, de Pinna E,  
507 Feasey N, et al. 2017. Salmonella enterica Serovar Typhimurium ST313 Responsible For  
508 Gastroenteritis In The UK Are Genetically Distinct From Isolates Causing Bloodstream Infections  
509 In Africa. *bioRxiv* 139576. doi: 10.1101/139576.
- 510 Bäumlér A, Fang FC. 2013. Host specificity of bacterial pathogens. *Cold Spring Harb Perspect Med* **3**:  
511 a010041.
- 512 Bayjanov JR, Molenaar D, Tzeneva V, Siezen RJ, van Hijum SAFT. 2012. PhenoLink--a web-tool for  
513 linking phenotype to -omics data for bacteria: application to gene-trait matching for Lactobacillus  
514 plantarum strains. *BMC Genomics* **13**: 170.
- 515 Blondel CJ, Jiménez JC, Contreras I, Santiviago CA. 2009. Comparative genomic analysis uncovers  
516 3 novel loci encoding type six secretion systems differentially distributed in Salmonella  
517 serotypes. *BMC Genomics* **10**: 354.
- 518 Blondel CJ, Jiménez JC, Leiva LE, Alvarez SA, Pinto BI, Contreras F, Pezoa D, Santiviago CA,  
519 Contreras I. 2013. The type VI secretion system encoded in Salmonella pathogenicity island 19  
520 is required for Salmonella enterica serotype Gallinarum survival within infected macrophages.  
521 *Infect Immun* **81**: 1207–1220.
- 522 Breiman L. 2001. Random Forests. *Mach Learn* **45**: 5–32.
- 523 Breiman L, Friedman J, Stone CJ, Olshen RA. 1984. *Classification and Regression Trees*. Chapman  
524 and Hall/CRC.
- 525 Carden SE, Walker GT, Honeycutt J, Lugo K, Pham T, Jacobson A, Bouley D, Idoyaga J, Tsolis RM,  
526 Monack D. 2017. Pseudogenization of the Secreted Effector Gene sseI Confers Rapid Systemic  
527 Dissemination of S. Typhimurium ST313 within Migratory Dendritic Cells. *Cell Host Microbe* **21**:

- 528 182–194.
- 529 Carden S, Okoro C, Dougan G, Monack D. 2015. Non-typhoidal Salmonella Typhimurium ST313  
530 isolates that cause bacteremia in humans stimulate less inflammasome activation than ST19  
531 isolates associated with gastroenteritis. *Pathog Dis* **73**. doi: 10.1093/femspd/ftu023.
- 532 Chen PE, Shapiro BJ. 2015. The advent of genome-wide association studies for bacteria. *Curr Opin*  
533 *Microbiol* **25**: 17–24.
- 534 Crawford RW, Rosales-Reyes R, Ramírez-Aguilar M de la L, Chapa-Azuela O, Alpuche-Aranda C,  
535 Gunn JS. 2010. Gallstones play a significant role in Salmonella spp. gallbladder colonization and  
536 carriage. *Proc Natl Acad Sci U S A* **107**: 4353–4358.
- 537 Croucher NJ, Page AJ, Connor TR, Delaney AJ, Keane JA, Bentley SD, Parkhill J, Harris SR. 2015.  
538 Rapid phylogenetic analysis of large samples of recombinant bacterial whole genome  
539 sequences using Gubbins. *Nucleic Acids Res* **43**: e15.
- 540 Dutilh BE, Backus L, Edwards RA, Wels M, Bayjanov JR, van Hijum SAFT. 2013. Explaining microbial  
541 phenotypes on a genomic scale: GWAS for microbes. *Brief Funct Genomics* **12**: 366–380.
- 542 Earle SG, Wu C-H, Charlesworth J, Stoesser N, Gordon NC, Walker TM, Spencer CCA, Iqbal Z,  
543 Clifton DA, Hopkins KL, et al. 2016. Identifying lineage effects when controlling for population  
544 structure improves power in bacterial association studies. *Nat Microbiol* **1**: 16041.
- 545 Fauci AS, Morens DM. 2012. The perpetual challenge of infectious diseases. *N Engl J Med* **366**: 454–  
546 461.
- 547 Feasey NA, Dougan G, Kingsley RA, Heyderman RS, Gordon MA. 2012. Invasive non-typhoidal  
548 salmonella disease: an emerging and neglected tropical disease in Africa. *Lancet* **379**: 2489–  
549 2499.
- 550 Feasey NA, Hadfield J, Keddy KH, Dallman TJ, Jacobs J, Deng X, Wigley P, Barquist Barquist L,  
551 Langridge GC, Feltwell T, et al. 2016. Distinct Salmonella Enteritidis lineages associated with  
552 enterocolitis in high-income settings and invasive disease in low-income settings. *Nat Genet* **48**:  
553 1211–1217.
- 554 Frank SA, Schmid-Hempel P. 2008. Mechanisms of pathogenesis and the evolution of parasite  
555 virulence. *J Evol Biol* **21**: 396–404.
- 556 Hadfield J, Croucher NJ, Goater RJ, Abudahab K, Aanensen DM, Harris SR. 2017. Phandango: an  
557 interactive viewer for bacterial population genomics. *Bioinformatics*. doi:

- 558 10.1093/bioinformatics/btx610.
- 559 Harvey RR, Friedman CR, Crim SM, Judd M, Barrett KA, Tolar B, Folster JP, Griffin PM, Brown AC.  
560 2017. Epidemiology of Salmonella enterica Serotype Dublin Infections among Humans, United  
561 States, 1968–2013. *Emerging Infectious Disease journal* **23**: 1493.
- 562 Huerta-Cepas J, Szklarczyk D, Forslund K, Cook H, Heller D, Walter MC, Rattei T, Mende DR,  
563 Sunagawa S, Kuhn M, et al. 2016. eggNOG 4.5: a hierarchical orthology framework with  
564 improved functional annotations for eukaryotic, prokaryotic and viral sequences. *Nucleic Acids*  
565 *Res* **44**: D286–93.
- 566 Kingsley RA, Bäumler AJ. 2000. Host adaptation and the emergence of infectious disease: the  
567 Salmonella paradigm. *Mol Microbiol* **36**: 1006–1014.
- 568 Kingsley RA, Kay S, Connor T, Barquist L, Sait L, Holt KE, Sivaraman K, Wileman T, Goulding D,  
569 Clare S, et al. 2013. Genome and transcriptome adaptation accompanying emergence of the  
570 definitive type 2 host-restricted Salmonella enterica serovar Typhimurium pathovar. *MBio* **4**:  
571 e00565–13.
- 572 Kingsley RA, Msefula CL, Thomson NR, Kariuki S, Holt KE, Gordon MA, Harris D, Clarke L,  
573 Whitehead S, Sangal V, et al. 2009. Epidemic multiple drug resistant Salmonella Typhimurium  
574 causing invasive disease in sub-Saharan Africa have a distinct genotype. *Genome Res* **19**:  
575 2279–2287.
- 576 Klemm EJ, Gkrania-Klotsas E, Hadfield J, Forbester JL, Harris SR, Hale C, Heath JN, Wileman T,  
577 Clare S, Kane L, et al. 2016. Emergence of host-adapted Salmonella Enteritidis through rapid  
578 evolution in an immunocompromised host. *Nat Microbiol* **1**: 15023.
- 579 Kthiri F, Gautier V, Le H-T, Prère M-F, Fayet O, Malki A, Landoulsi A, Richarme G. 2010.  
580 Translational defects in a mutant deficient in YajL, the bacterial homolog of the parkinsonism-  
581 associated protein DJ-1. *J Bacteriol* **192**: 6302–6306.
- 582 Kuo C-H, Ochman H. 2010. The extinction dynamics of bacterial pseudogenes. *PLoS Genet* **6**.  
583 <http://dx.doi.org/10.1371/journal.pgen.1001050>.
- 584 Laabei M, Recker M, Rudkin JK, Aldeljawi M, Gulay Z, Sloan TJ, Williams P, Endres JL, Bayles KW,  
585 Fey PD, et al. 2014. Predicting the virulence of MRSA from its genome sequence. *Genome Res*  
586 **24**: 839–849.
- 587 Langridge GC, Fookes M, Connor TR, Feltwell T, Feasey N, Parsons BN, Seth-Smith HMB, Barquist



- 588 L, Stedman A, Humphrey T, et al. 2015. Patterns of genome evolution that have accompanied  
589 host adaptation in Salmonella. *Proc Natl Acad Sci U S A* **112**: 863–868.
- 590 Langridge GC, Phan M-D, Turner DJ, Perkins TT, Parts L, Haase J, Charles I, Maskell DJ, Peters SE,  
591 Dougan G, et al. 2009. Simultaneous assay of every Salmonella Typhi gene using one million  
592 transposon mutants. *Genome Res* **19**: 2308–2316.
- 593 Lees JA, Vehkala M, Välimäki N, Harris SR, Chewapreecha C, Croucher NJ, Marttinen P, Davies MR,  
594 Steer AC, Tong SYC, et al. 2016. Sequence element enrichment analysis to determine the  
595 genetic basis of bacterial phenotypes. *Nat Commun* **7**: 12797.
- 596 Le H-T, Gautier V, Kthiri F, Malki A, Messaoudi N, Mihoub M, Landoulsi A, An YJ, Cha S-S, Richarme  
597 G. 2012. YajL, prokaryotic homolog of parkinsonism-associated protein DJ-1, functions as a  
598 covalent chaperone for thiol proteome. *J Biol Chem* **287**: 5861–5870.
- 599 Lerat E, Ochman H. 2005. Recognizing the pseudogenes in bacterial genomes. *Nucleic Acids Res*  
600 **33**: 3125–3132.
- 601 Liaw A, Wiener M. 2002. Classification and regression by randomForest. *R news* **2**: 18–22.
- 602 Li H. 2011. A statistical framework for SNP calling, mutation discovery, association mapping and  
603 population genetical parameter estimation from sequencing data. *Bioinformatics* **27**: 2987–2993.
- 604 Li H, Durbin R. 2009. Fast and accurate short read alignment with Burrows-Wheeler transform.  
605 *Bioinformatics* **25**: 1754–1760.
- 606 Lippert C, Listgarten J, Liu Y, Kadie CM, Davidson RI, Heckerman D. 2011. FaST linear mixed  
607 models for genome-wide association studies. *Nat Methods* **8**: 833–835.
- 608 Loman NJ, Pallen MJ. 2015. Twenty years of bacterial genome sequencing. *Nat Rev Microbiol* **13**:  
609 787–794.
- 610 Marvig RL, Sommer LM, Molin S, Johansen HK. 2015. Convergent evolution and adaptation of  
611 *Pseudomonas aeruginosa* within patients with cystic fibrosis. *Nat Genet* **47**: 57–64.
- 612 McClelland M, Sanderson KE, Clifton SW, Latreille P, Porwollik S, Sabo A, Meyer R, Bieri T, Ozersky  
613 P, McLellan M, et al. 2004. Comparison of genome degradation in Paratyphi A and Typhi,  
614 human-restricted serovars of *Salmonella enterica* that cause typhoid. *Nat Genet* **36**: 1268–1274.
- 615 McKenna A, Hanna M, Banks E, Sivachenko A, Cibulskis K, Kernytsky A, Garimella K, Altshuler D,  
616 Gabriel S, Daly M, et al. 2010. The Genome Analysis Toolkit: a MapReduce framework for  
617 analyzing next-generation DNA sequencing data. *Genome Res* **20**: 1297–1303.

- 618 McNally A, Thomson NR, Reuter S, Wren BW. 2016. “Add, stir and reduce”: *Yersinia* spp. as model  
619 bacteria for pathogen evolution. *Nat Rev Microbiol* **14**: 177–190.
- 620 Merhej V, Georgiades K, Raoult D. 2013. Postgenomic analysis of bacterial pathogens repertoire  
621 reveals genome reduction rather than virulence factors. *Brief Funct Genomics* **12**: 291–304.
- 622 Mulder DT, Cooper CA, Coombes BK. 2012. Type VI secretion system-associated gene clusters  
623 contribute to pathogenesis of *Salmonella enterica* serovar Typhimurium. *Infect Immun* **80**: 1996–  
624 2007.
- 625 Nuccio S-P, Bäumlner AJ. 2014. Comparative Analysis of *Salmonella* Genomes Identifies a Metabolic  
626 Network for Escalating Growth in the Inflamed Gut. *MBio* **5**: e00929–14–e00929–14.
- 627 Okoro CK, Barquist L, Connor TR, Harris SR, Clare S, Stevens MP, Arends MJ, Hale C, Kane L,  
628 Pickard DJ, et al. 2015. Signatures of Adaptation in Human Invasive *Salmonella* Typhimurium  
629 ST313 Populations from Sub-Saharan Africa. *PLoS Negl Trop Dis* **9**: e0003611.
- 630 Okoro CK, Kingsley RA, Connor TR, Harris SR, Parry CM, Al-Mashhadani MN, Kariuki S, Msefula CL,  
631 Gordon MA, de Pinna E, et al. 2012. Intracontinental spread of human invasive *Salmonella*  
632 Typhimurium pathovariants in sub-Saharan Africa. *Nat Genet* **44**: 1215–1221.
- 633 Pallen MJ, Wren BW. 2007. Bacterial pathogenomics. *Nature* **449**: 835–842.
- 634 Pappu V, Pardalos PM. 2014. High-Dimensional Data Classification. In *Clusters, Orders, and Trees: Methods and Applications* (eds. F. Aleskerov, B. Goldengorin, and P.M. Pardalos), *Springer Optimization and Its Applications*, pp. 119–150, Springer New York.
- 637 Parkhill J, Dougan G, James KD, Thomson NR, Pickard D, Wain J, Churcher C, Mungall KL, Bentley  
638 SD, Holden MT, et al. 2001. Complete genome sequence of a multiple drug resistant *Salmonella*  
639 *enterica* serovar Typhi CT18. *Nature* **413**: 848–852.
- 640 Parsons BN, Humphrey S, Salisbury AM, Mikoleit J, Hinton JCD, Gordon MA, Wigley P. 2013.  
641 Invasive non-typhoidal *Salmonella* typhimurium ST313 are not host-restricted and have an  
642 invasive phenotype in experimentally infected chickens. *PLoS Negl Trop Dis* **7**: e2487.
- 643 Pepper ED, Farrell MJ, Finkel SE. 2006. Role of penicillin-binding protein 1b in competitive stationary-  
644 phase survival of *Escherichia coli*. *FEMS Microbiol Lett* **263**: 61–67.
- 645 Power RA, Parkhill J, de Oliveira T. 2017. Microbial genome-wide association studies: lessons from  
646 human GWAS. *Nat Rev Genet* **18**: 41–50.
- 647 Quick J, Loman NJ, Duraffour S, Simpson JT, Severi E, Cowley L, Bore JA, Koundouno R, Dudas G,

- 648 Mikhail A, et al. 2016. Real-time, portable genome sequencing for Ebola surveillance. *Nature*  
649 **530**: 228–232.
- 650 Rabsch W, Andrews HL, Kingsley RA, Prager R, Tschäpe H, Adams LG, Bäumlér AJ. 2002.  
651 *Salmonella enterica* serotype Typhimurium and its host-adapted variants. *Infect Immun* **70**:  
652 2249–2255.
- 653 Ramachandran G, Panda A, Higginson EE, Ateh E, Lipsky MM, Sen S, Matson CA, Permala-Booth J,  
654 DeTolla LJ, Tennant SM. 2017. Virulence of invasive *Salmonella* Typhimurium ST313 in animal  
655 models of infection. *PLoS Negl Trop Dis* **11**: e0005697.
- 656 Ramachandran G, Perkins DJ, Schmidlein PJ, Tulapurkar ME, Tennant SM. 2015. Invasive  
657 *Salmonella* Typhimurium ST313 with naturally attenuated flagellin elicits reduced inflammation  
658 and replicates within macrophages. *PLoS Negl Trop Dis* **9**: e3394.
- 659 Reuter S, Connor TR, Barquist L, Walker D, Feltwell T, Harris SR, Fookes M, Hall ME, Petty NK,  
660 Fuchs TM, et al. 2014. Parallel independent evolution of pathogenicity within the genus *Yersinia*.  
661 *Proc Natl Acad Sci U S A* **111**: 6768–6773.
- 662 Roth JR, Lawrence JG, Bobik TA. 1996. Cobalamin (coenzyme B12): synthesis and biological  
663 significance. *Annu Rev Microbiol* **50**: 137–181.
- 664 Schürch AC, Schaik W. 2017. Challenges and opportunities for whole-genome sequencing--based  
665 surveillance of antibiotic resistance. *Ann N Y Acad Sci* **1388**: 108–120.
- 666 Singletary LA, Karlinsey JE, Libby SJ, Mooney JP, Lokken KL, Tsolis RM, Byndloss MX, Hirao LA,  
667 Gaulke CA, Crawford RW, et al. 2016. Loss of Multicellular Behavior in Epidemic African  
668 Nontyphoidal *Salmonella enterica* Serovar Typhimurium ST313 Strain D23580. *MBio* **7**. doi:  
669 10.1128/mBio.02265-15.
- 670 Stamatakis A. 2014. RAxML version 8: a tool for phylogenetic analysis and post-analysis of large  
671 phylogenies. *Bioinformatics* **30**: 1312–1313.
- 672 Stephan J, Stegle O, Beyer A. 2015. A random forest approach to capture genetic effects in the  
673 presence of population structure. *Nat Commun* **6**: 7432.
- 674 The HC, Thanh DP, Holt KE, Thomson NR, Baker S. 2016. The genomic signatures of *Shigella*  
675 evolution, adaptation and geographical spread. *Nat Rev Microbiol*.  
676 <http://dx.doi.org/10.1038/nrmicro.2016.10>.
- 677 Thomson NR, Clayton DJ, Windhorst D, Vernikos G, Davidson S, Churcher C, Quail MA, Stevens M,

- 678 Jones MA, Watson M, et al. 2008. Comparative genome analysis of Salmonella Enteritidis PT4  
679 and Salmonella Gallinarum 287/91 provides insights into evolutionary and host adaptation  
680 pathways. *Genome Res* **18**: 1624–1637.
- 681 Touw WG, Bayjanov JR, Overmars L, Backus L, Boekhorst J, Wels M, van Hijum SAFT. 2013. Data  
682 mining in the Life Sciences with Random Forest: a walk in the park or lost in the jungle? *Brief*  
683 *Bioinform* **14**: 315–326.
- 684 Typas A, Banzhaf M, Gross CA, Vollmer W. 2011. From the regulation of peptidoglycan synthesis to  
685 bacterial growth and morphology. *Nat Rev Microbiol* **10**: 123–136.
- 686 Uche IV, MacLennan CA, Saul A. 2017. A Systematic Review of the Incidence, Risk Factors and  
687 Case Fatality Rates of Invasive Nontyphoidal Salmonella (iNTS) Disease in Africa (1966 to  
688 2014). *PLoS Negl Trop Dis* **11**: e0005118.
- 689 Wei W-H, Hemani G, Haley CS. 2014. Detecting epistasis in human complex traits. *Nat Rev Genet*  
690 **15**: 722–733.
- 691 Wheeler NE, Barquist L, Kingsley RA, Gardner PP. 2016. A profile-based method for identifying  
692 functional divergence of orthologous genes in bacterial genomes. *Bioinformatics* **32**: 3566–3574.  
693
